# Supplementary material for: Synthesis and antibacterial activity studies in vitro of indirubin-3′-monoximes
Source: Royal Society of Chemistry journal article supplement (doi:10.1039/d2ra01035f), 2022-01-01

## Synthesis and Antibacterial Activity Studies *in vitro* of Indirubin-3'-monoximes

Fen-Fen Yang,<sup>a,#</sup> Ming-Shan Shuai,<sup>a,#</sup> Xiang Guan,<sup>a</sup> Mao Zhang,<sup>a</sup> Qing-Qing Zhang,<sup>a</sup>  
Xiao-Zhong Fu,<sup>a</sup> Zong-Qin Li,<sup>c</sup> Da-Peng Wang,<sup>b</sup> Meng Zhou,<sup>a</sup> Yuan-Yong Yang,<sup>a</sup>  
Ting Liu,<sup>a</sup> Bin He,<sup>a</sup> and Yong-Long Zhao<sup>a,\*</sup>

<sup>a</sup> State Key Laboratory of Functions and Applications of Medicinal Plants, School of Pharmacy, and Engineering Research Center for the Development and Application of Ethnic Medicine and TCM (Ministry of Education), Guizhou Medical University, Guiyang 550004, People's Republic of China E-mail: zhaoyl05@126.com; [zhaoyonglong@gmc.edu.cn](mailto:zhaoyonglong@gmc.edu.cn)

<sup>b</sup> Key Laboratory of Environmental Pollution Monitoring and Disease Control, Ministry of Education, Guizhou Medical University, Guiyang, 550025, People's Republic of China

<sup>c</sup> Department of Neurology, Sichuan Mianyang 404 Hospital, Mianyang, 621000, People's Republic of China.

<sup>#</sup>F-F Yang and M-S Shuai contributed equally to this work.

### Table of Contents

|                                                                                                                              |    |
|------------------------------------------------------------------------------------------------------------------------------|----|
| NMR spectrogram.....                                                                                                         | 2  |
| HPLC purity analysis.....                                                                                                    | 34 |
| Bacterial activity results.....                                                                                              | 36 |
| Transmission electron micrographs (TEM) of <i>S. aureus</i> ATCC25923 cells.....                                             | 37 |
| Fluorescence micrographs of <i>S. aureus</i> ATCC 29213 cells.....                                                           | 39 |
| Fluorescence micrographs of multi-drug resistant <i>S. aureus</i> 20151027077 cells. ....                                    | 41 |
| Histopathological section of mice liver tissue after skin irritation test treated with 12.8 µg/mL <b>5aa</b> for 1-72 h..... | 43 |

# NMR spectrogram

## (2Z, 3E)-3-(hydroxyimino)-[2, 3'-biindolinylidene]-2'-one (5a):

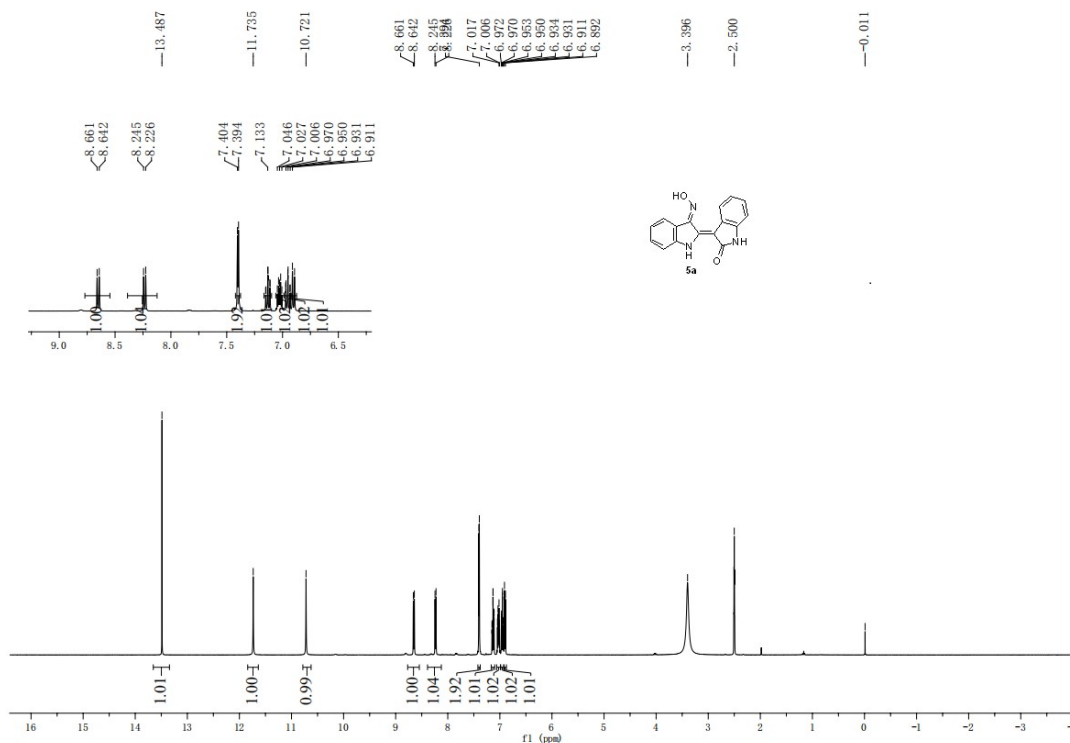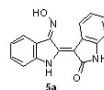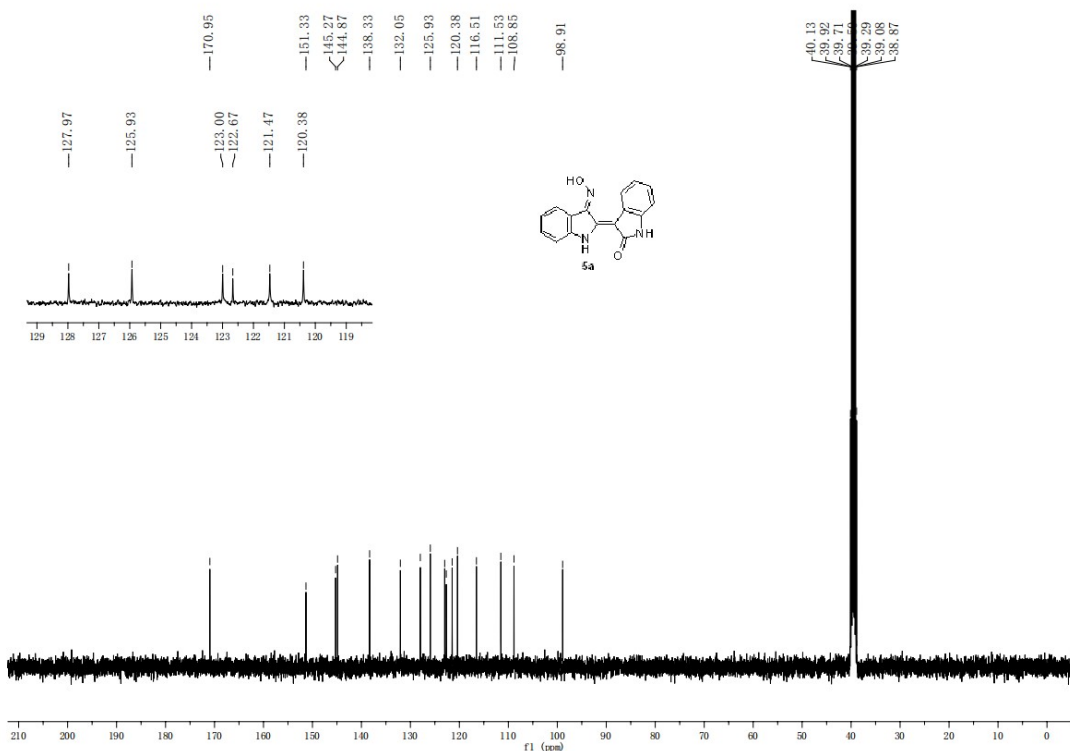

**(2*Z*, 3*E*)-3-(hydroxyimino)-5-methyl-[2, 3'-biindolinyldene]-2'-one (5b):**

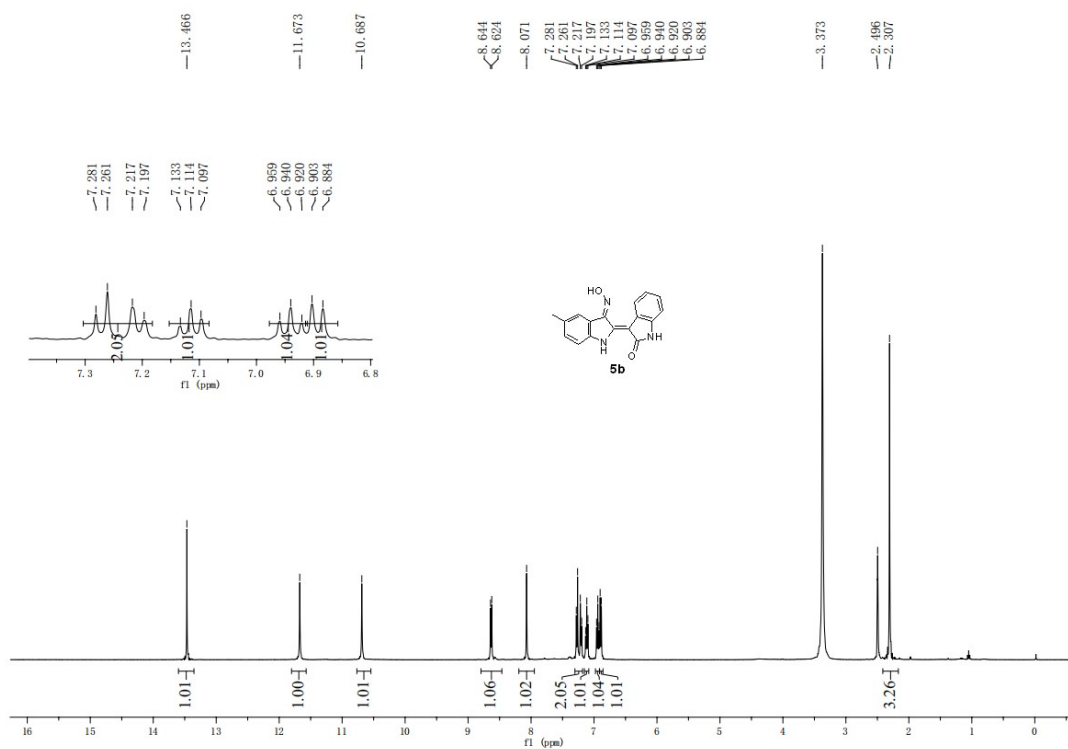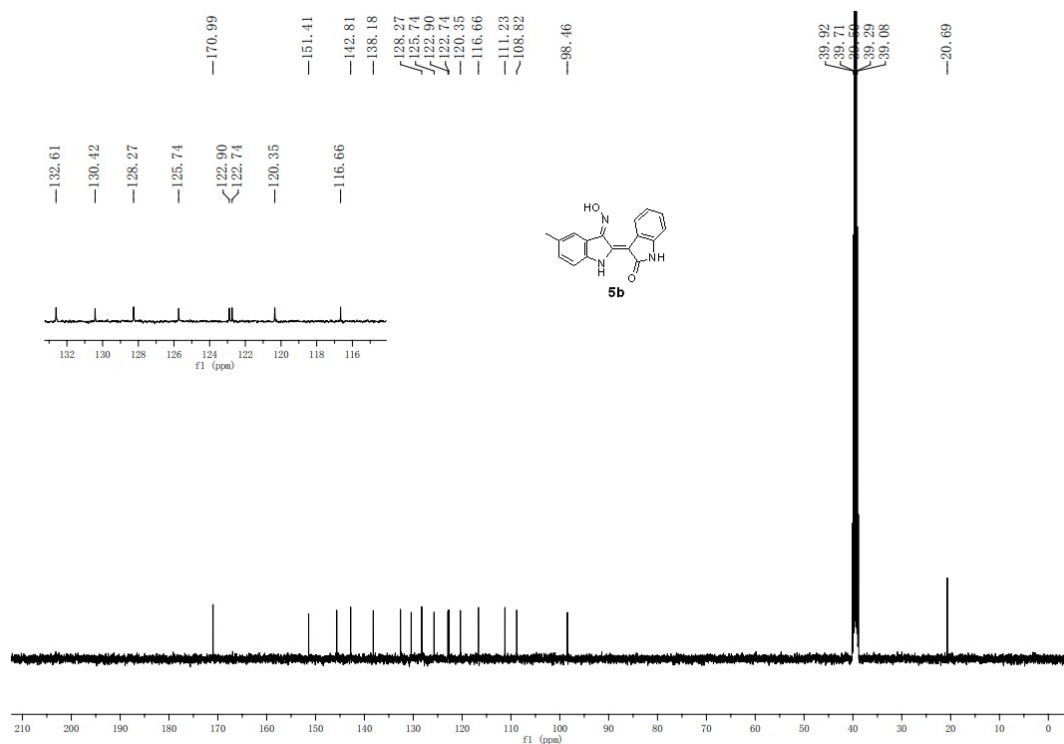

**(2Z, 3E)-3-(hydroxyimino)-5-methoxy-[2, 3'-biindolylidene]-2'-one (5c):**

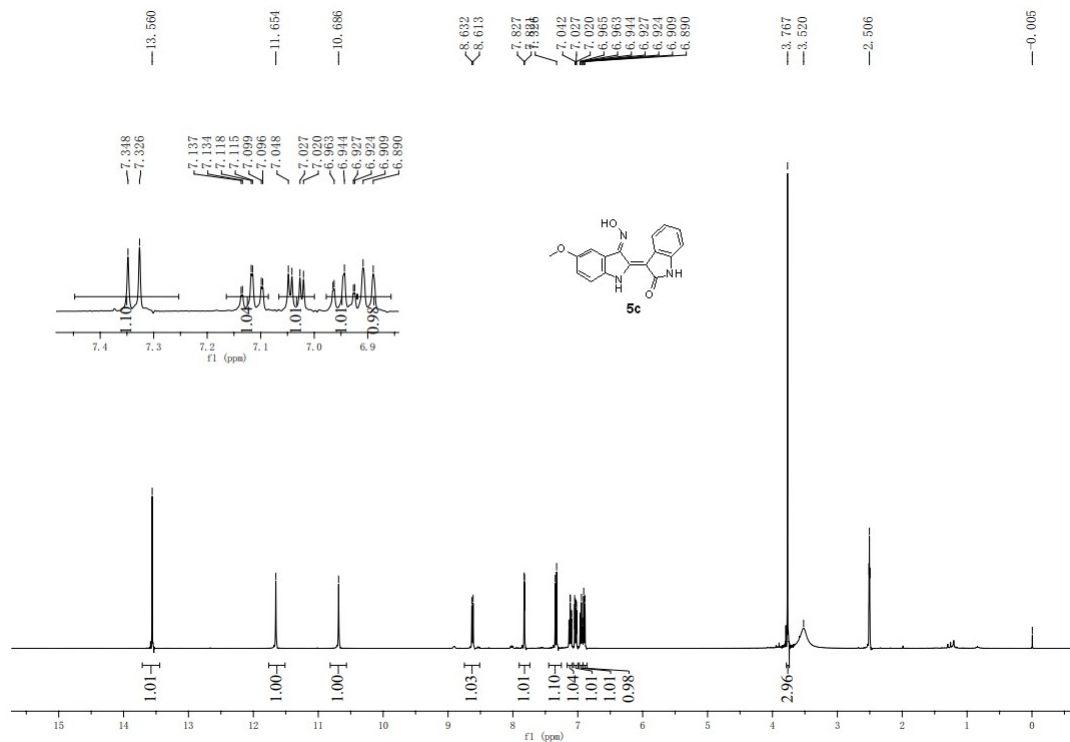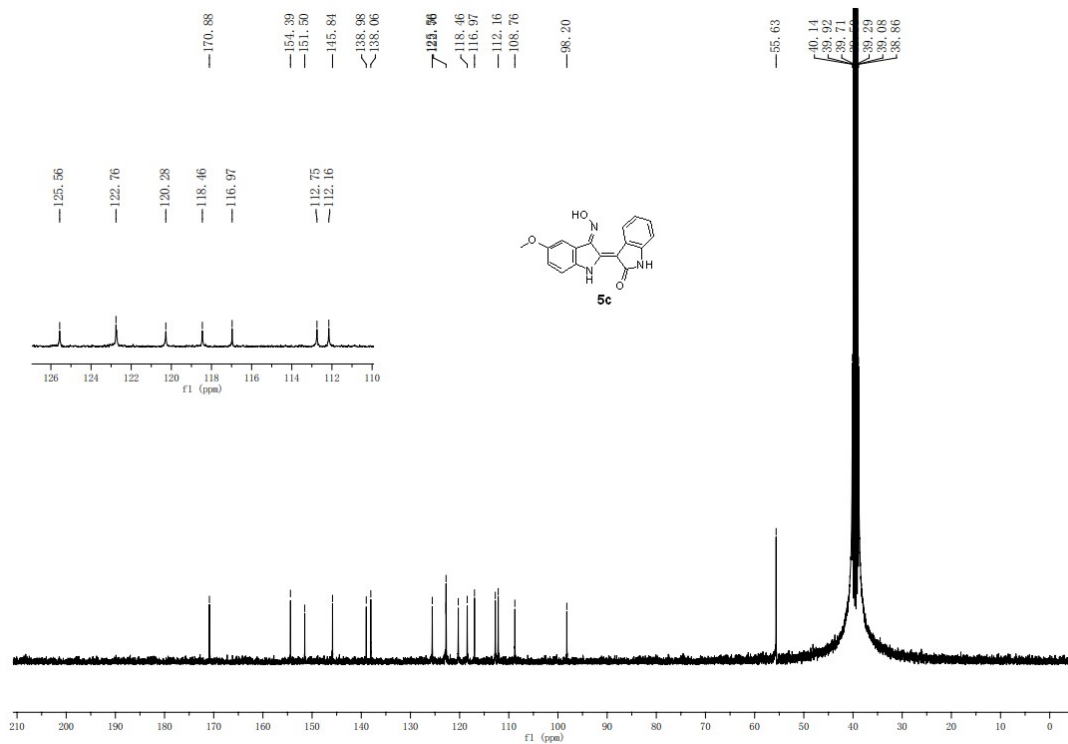

**(2Z, 3E)-3-(hydroxyimino)-5-nitro-[2, 3'-biindolinylidene]-2'-one (5d):**

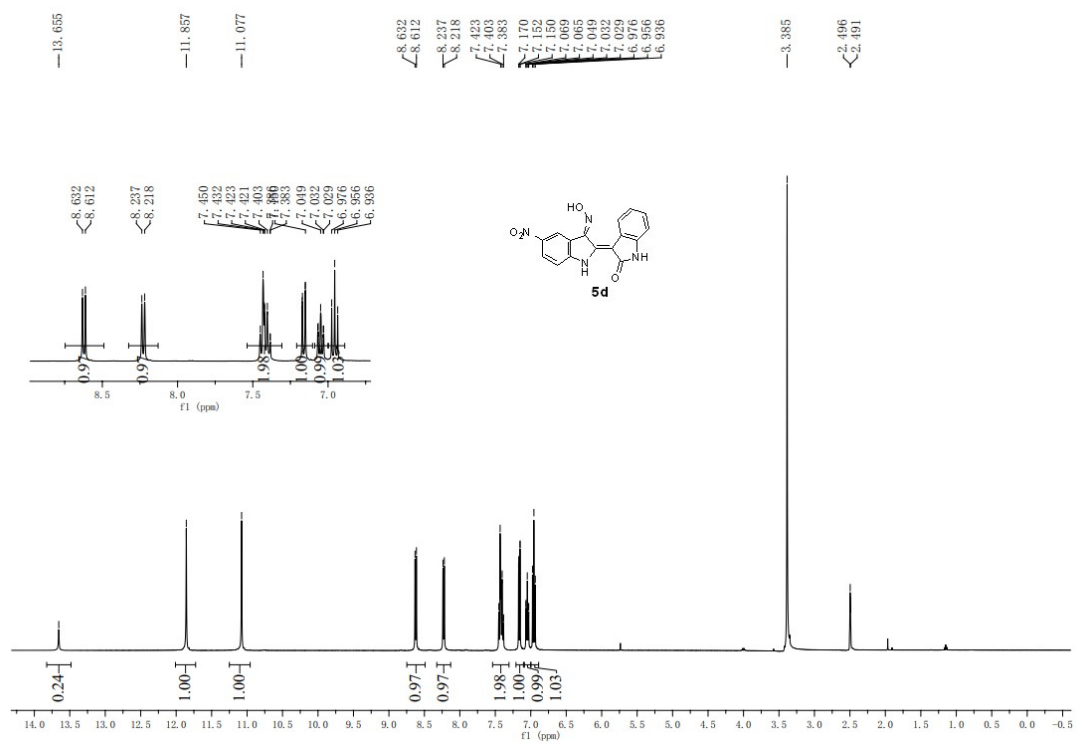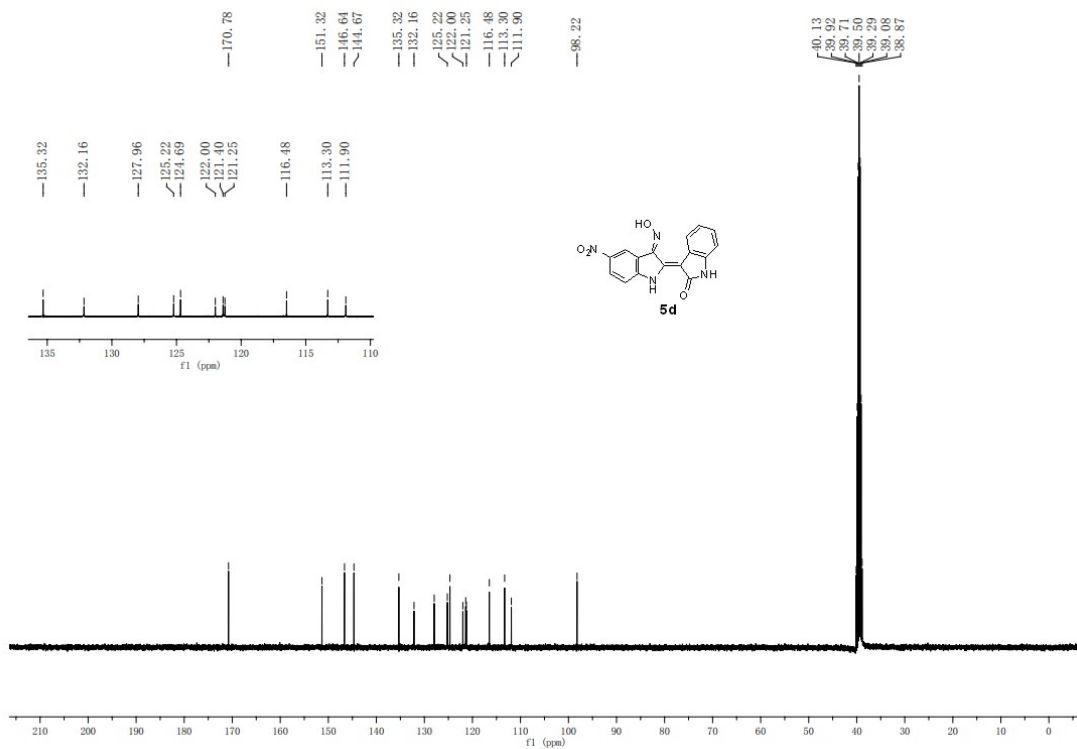

**(2*Z*, 3*E*)-5-chloro-3-(hydroxyimino)-[2, 3'-biindolinylidene]-2'-one (5e):**

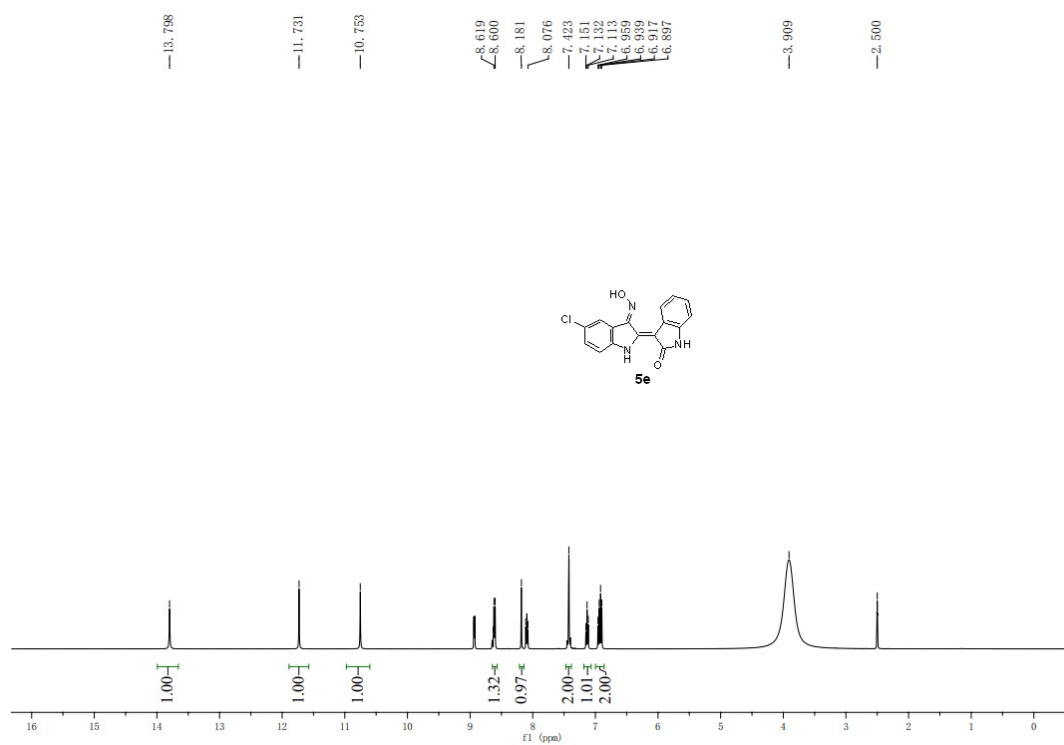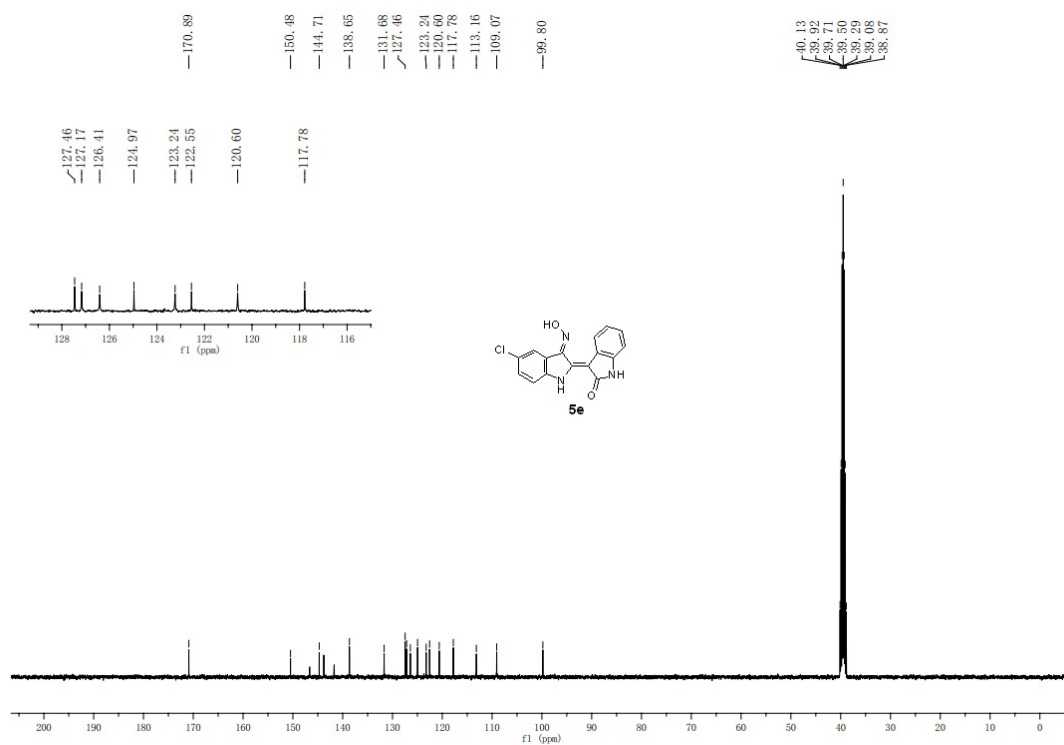

**(2Z, 3E)-5-bromo-3-(hydroxyimino)-[2, 3'-biindolinylidene]-2'-one (5f):**

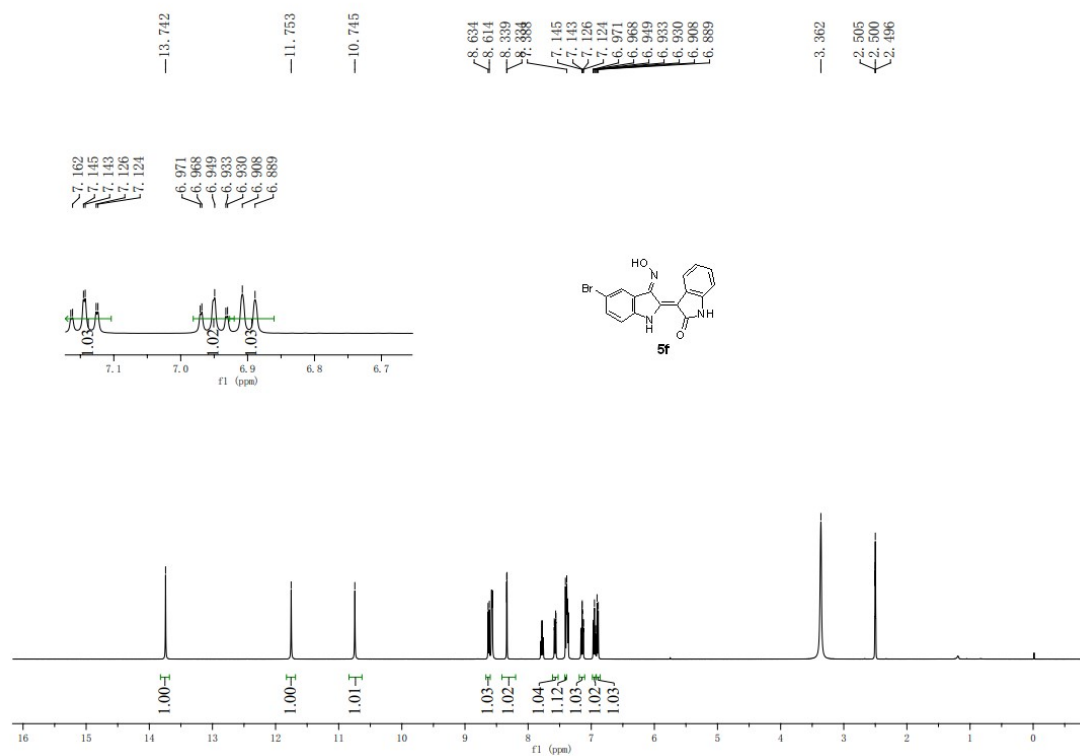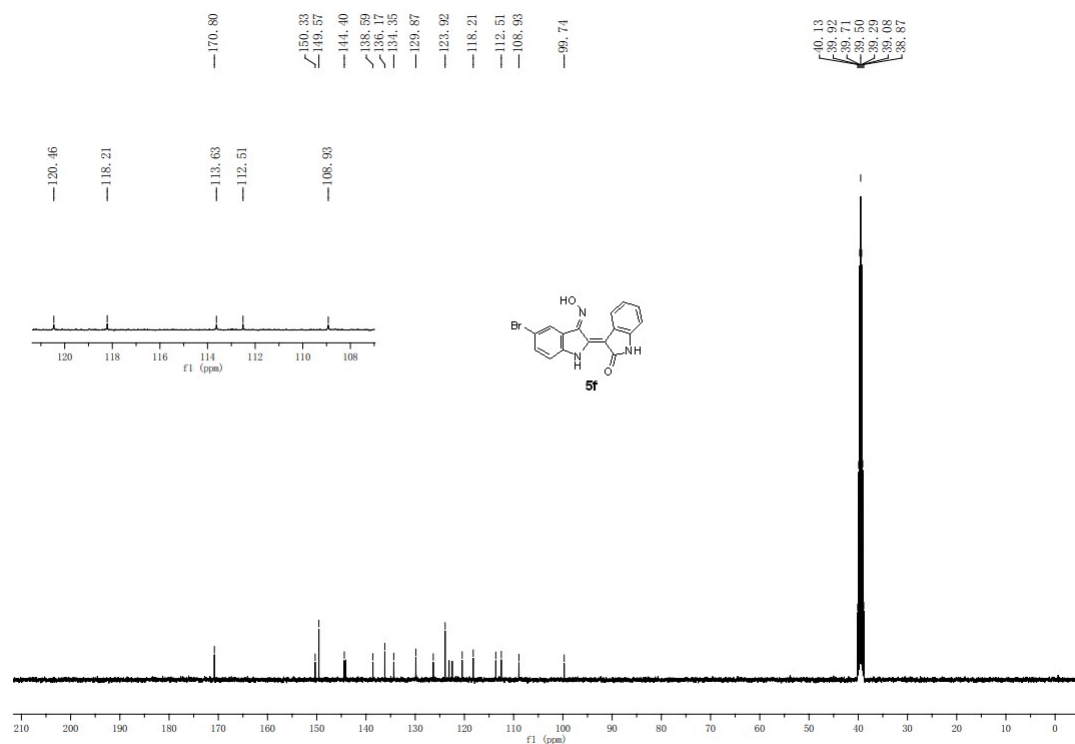

**(2Z, 3E)-6-fluoro-3-(hydroxyimino)-[2, 3'-biindolylidene]-2'-one (5g):**

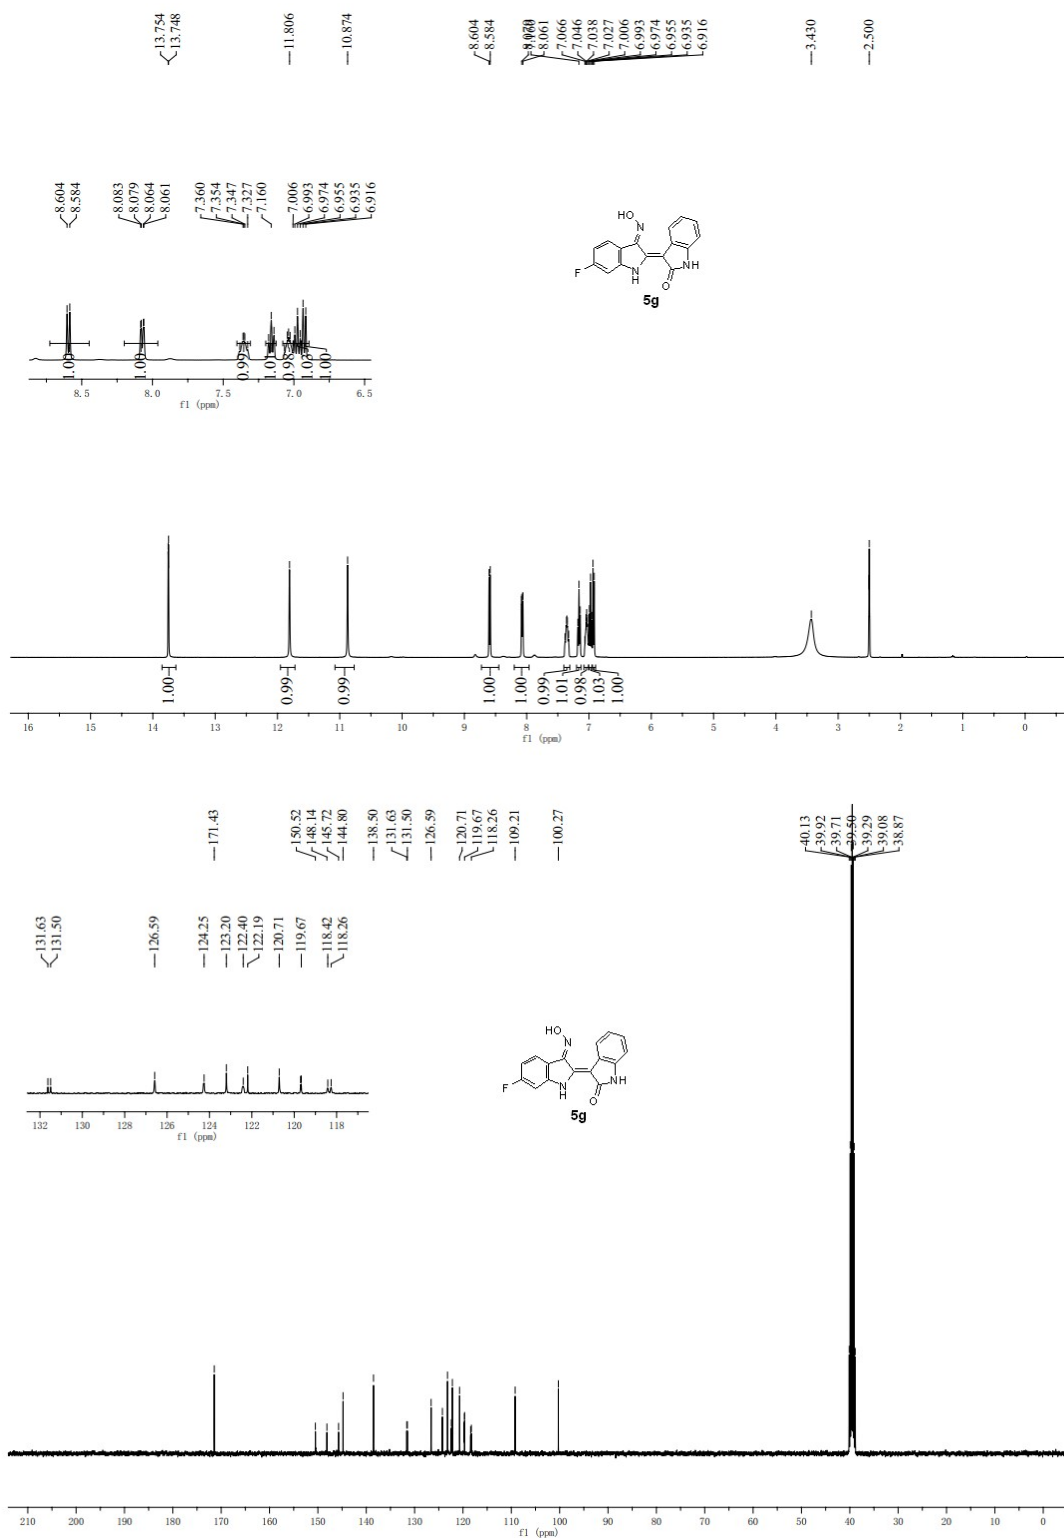



**(2Z, 3E)-3-(hydroxyimino)-6-methoxy-[2, 3'-biindolylidene]-2'-one (5h):**

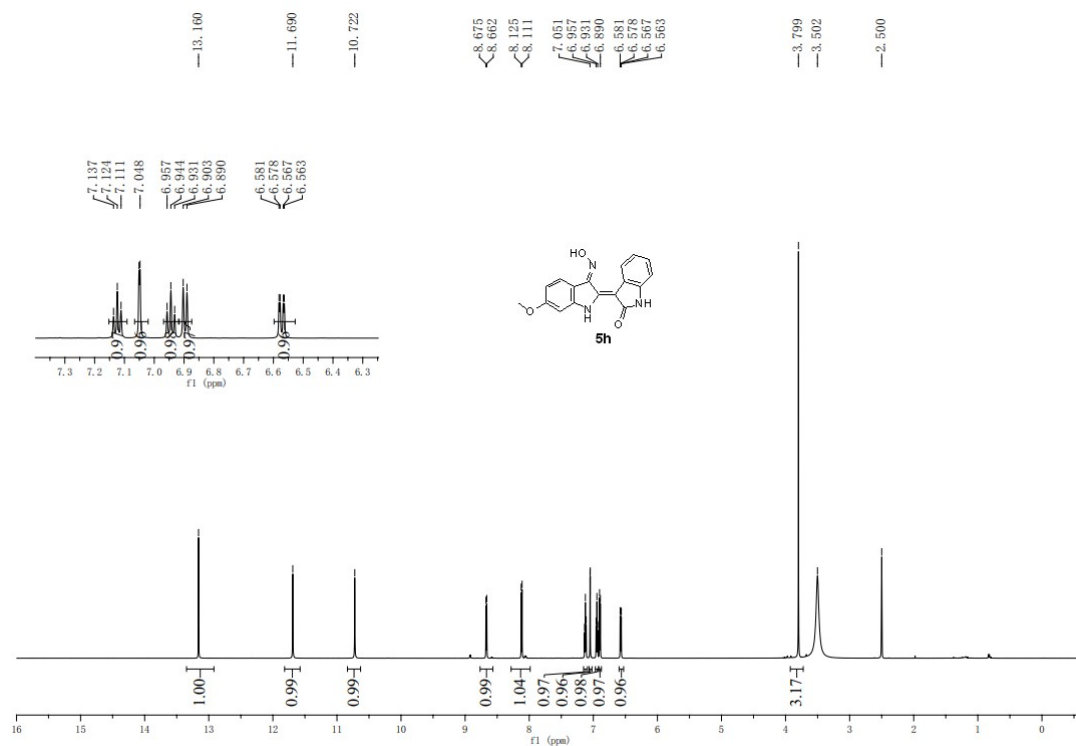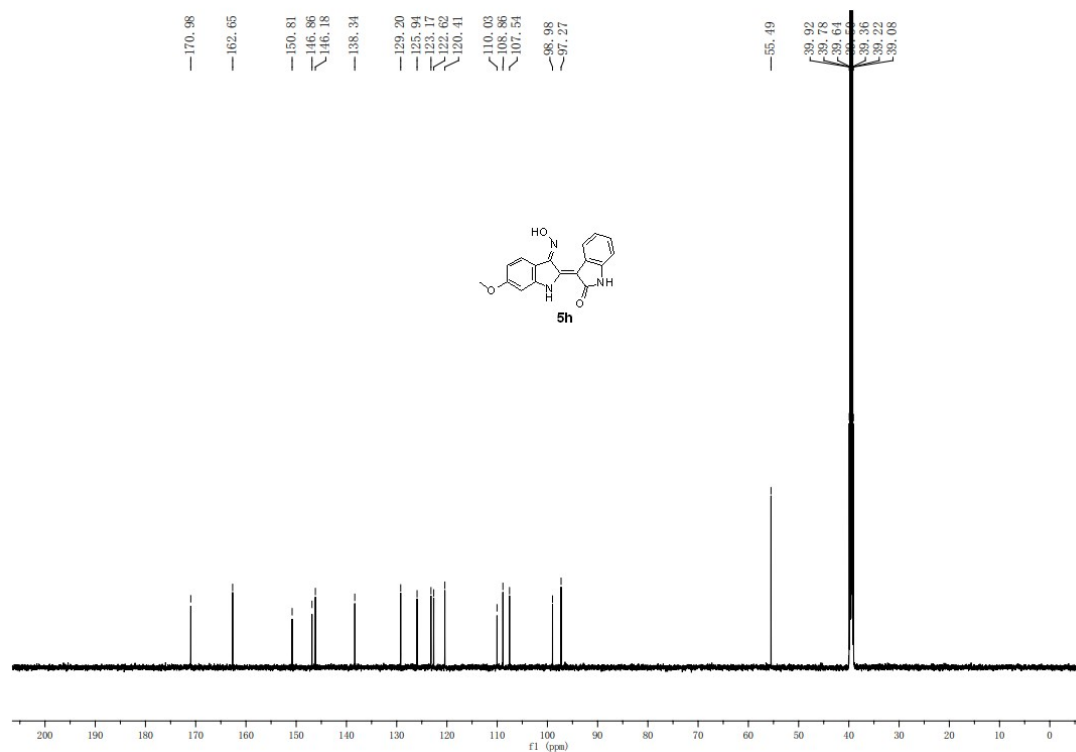

**(2Z, 3E)-6-chloro-3-(hydroxyimino)-[2, 3'-biindolinylidene]-2'-one (5i):**

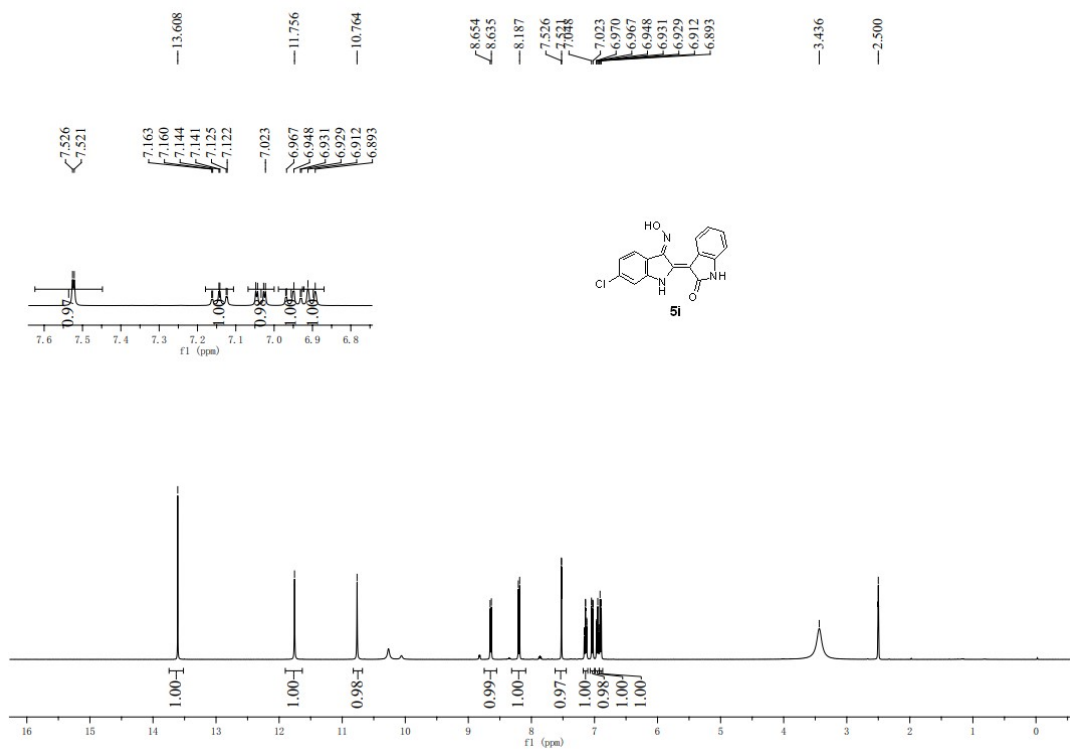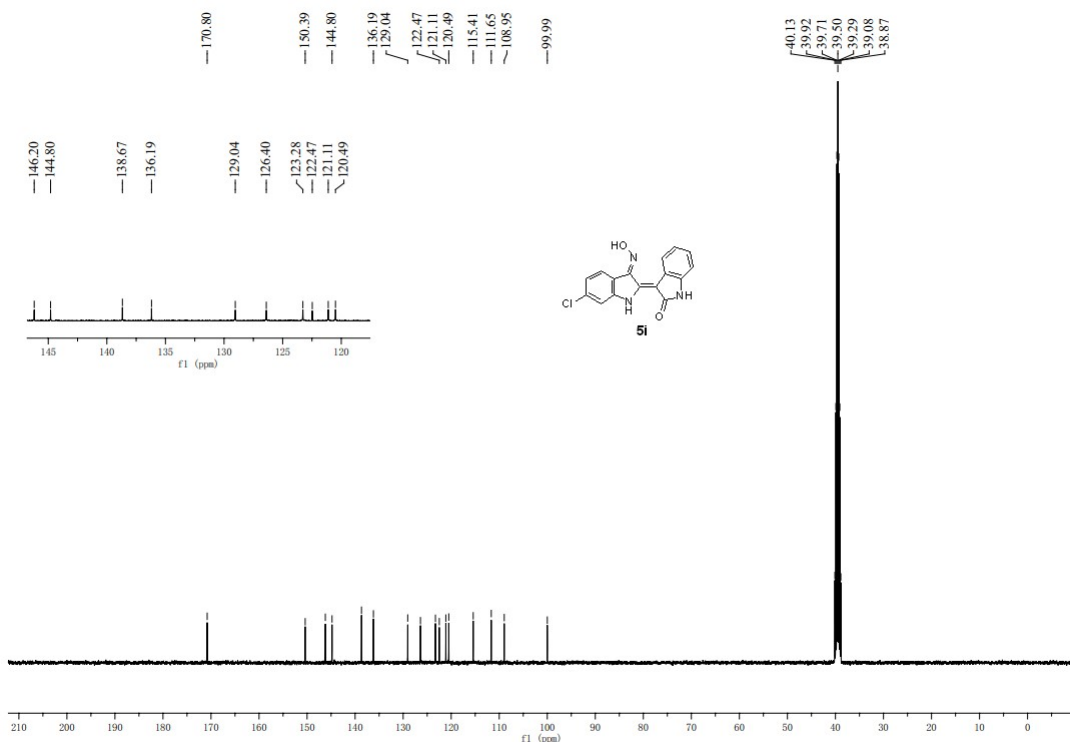

**(2Z, 3E)-6-bromo-3-(hydroxyimino)-[2, 3'-biindolinylidene]-2'-one (5j):**

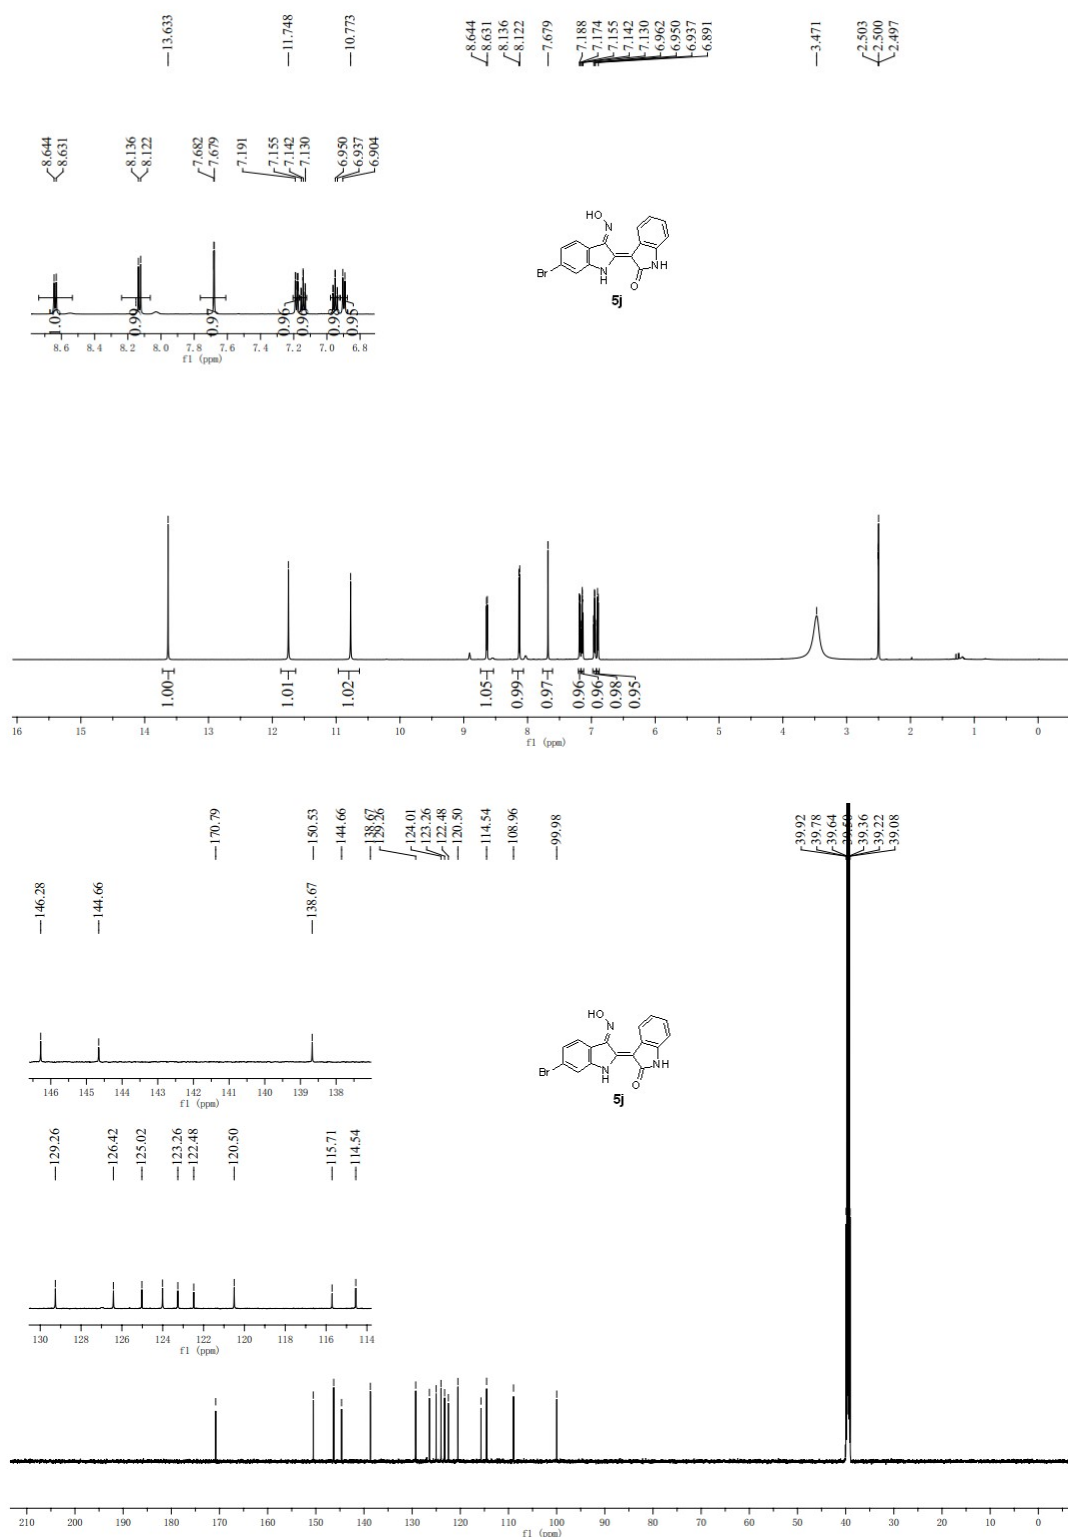

(2Z, 3E)-3-(hydroxyimino)-6-nitro-[2, 3'-biindolinylidene]-2'-one (5k):

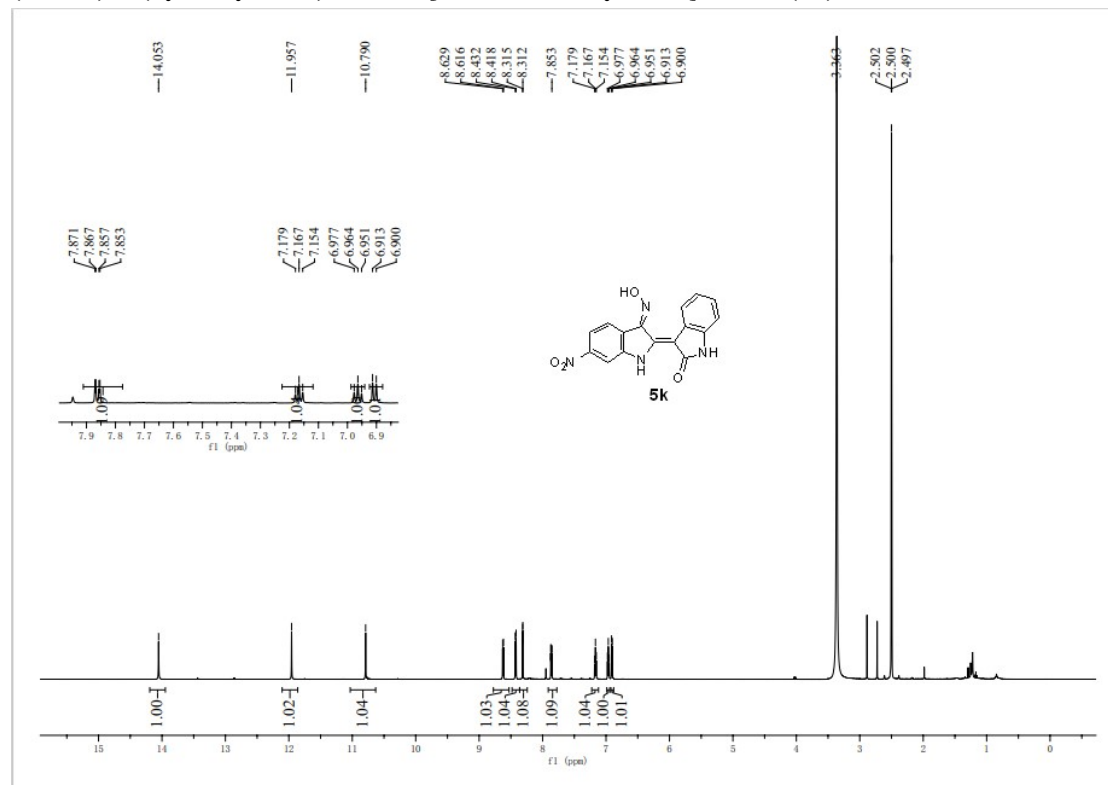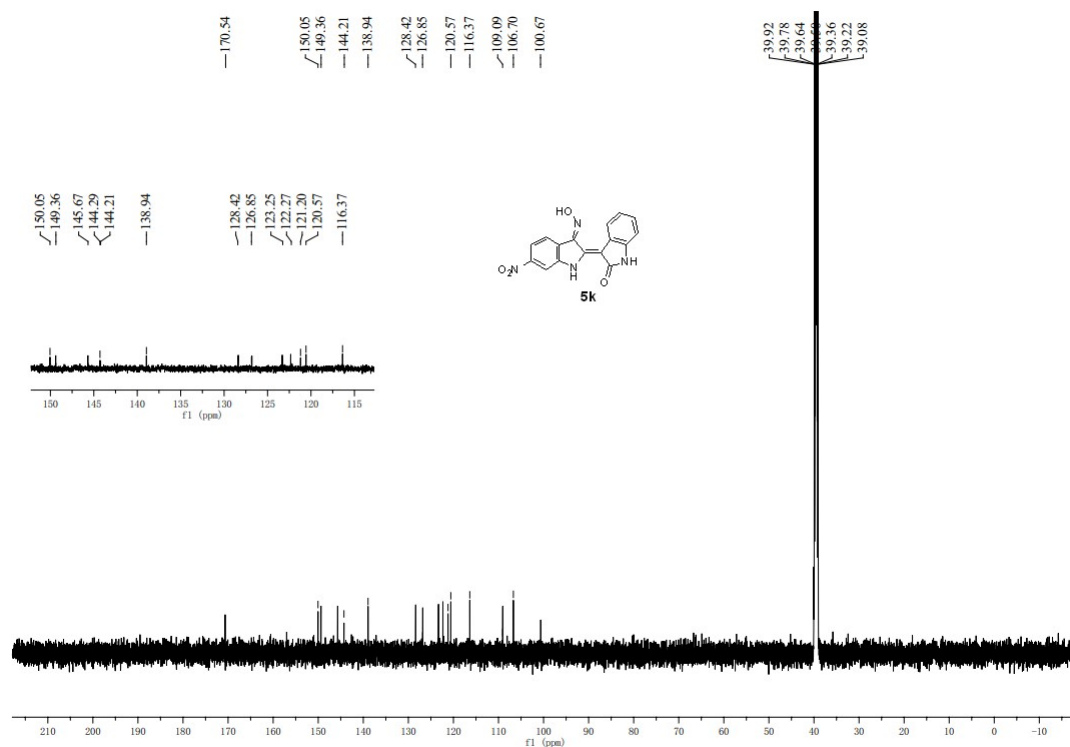

**(2Z, 3E)-3-(hydroxyimino)-6-methyl-[2, 3'-biindolinyldene]-2'-one (51):**

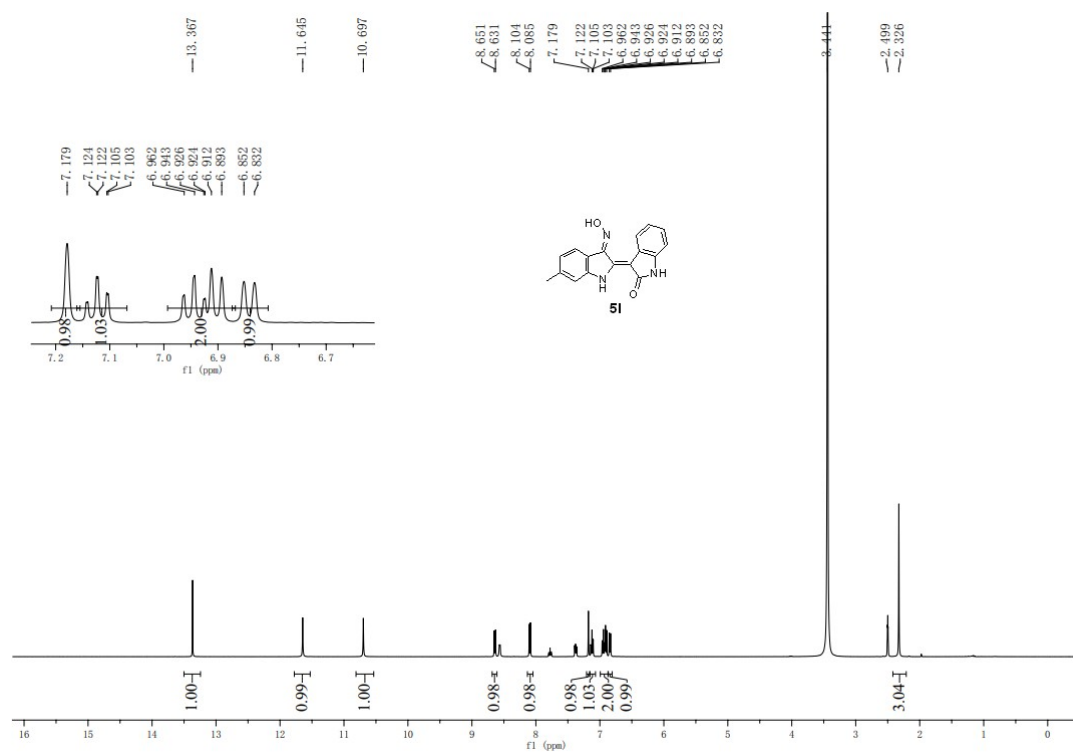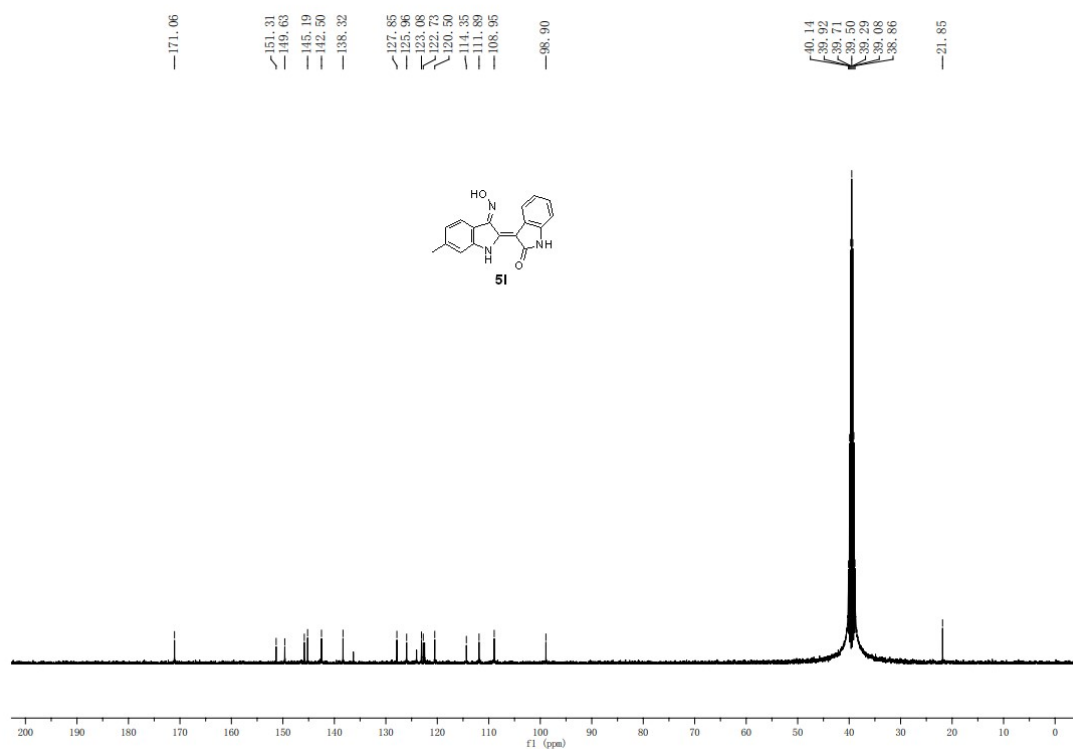



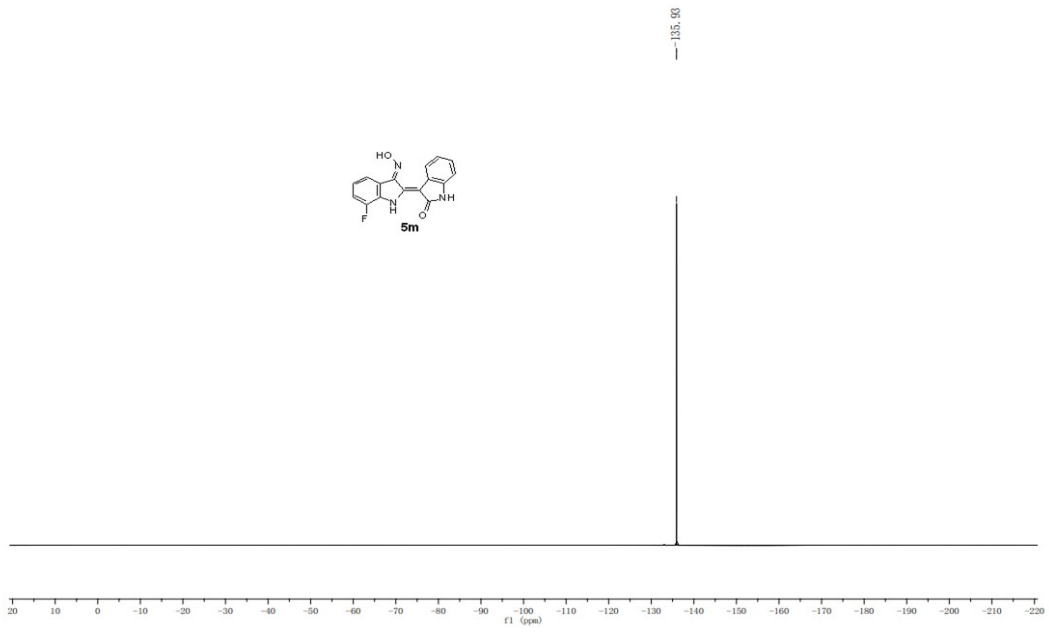

**(2Z, 3E)-3-(hydroxyimino)-5'-methyl-[2, 3'-biindolinylidene]-2'-one (5o):**

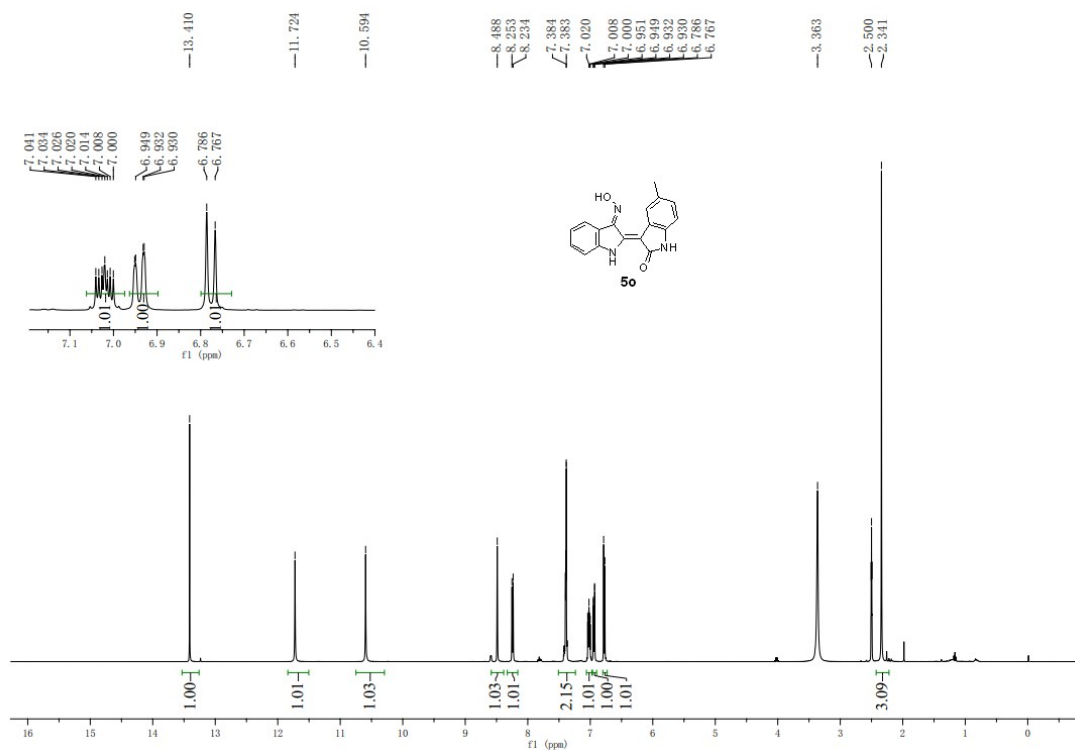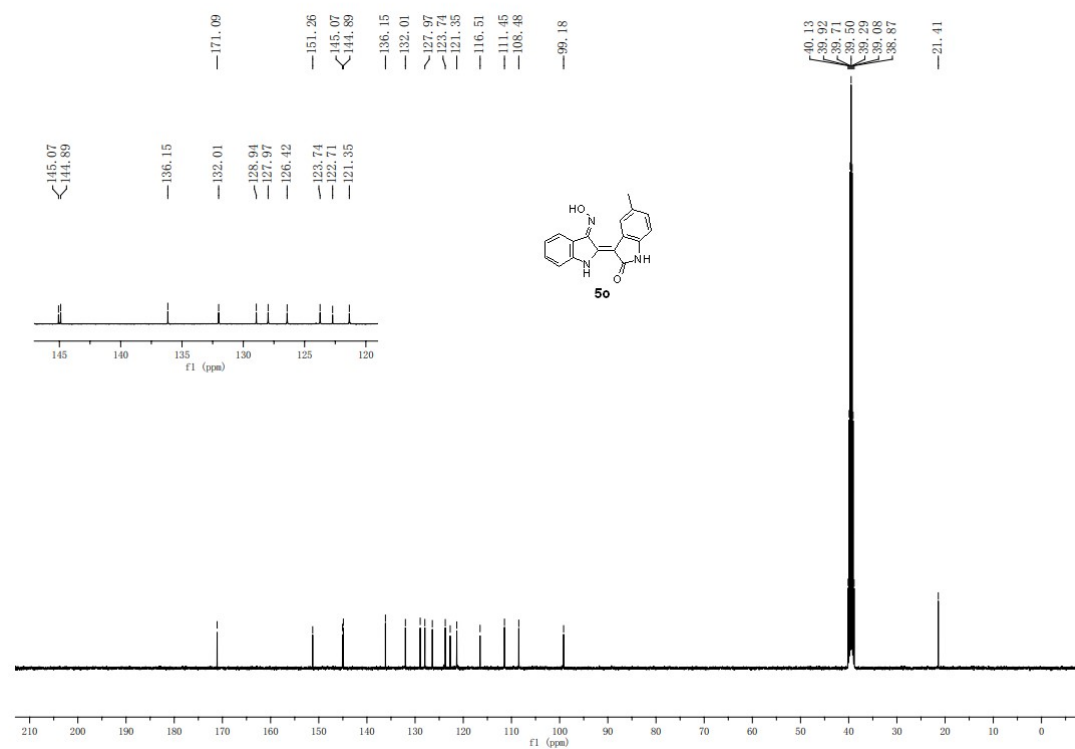



**(2Z, 3E)-3-(hydroxyimino)-5'-methoxy-[2, 3'-biindolinylidene]-2'-one (5p):**

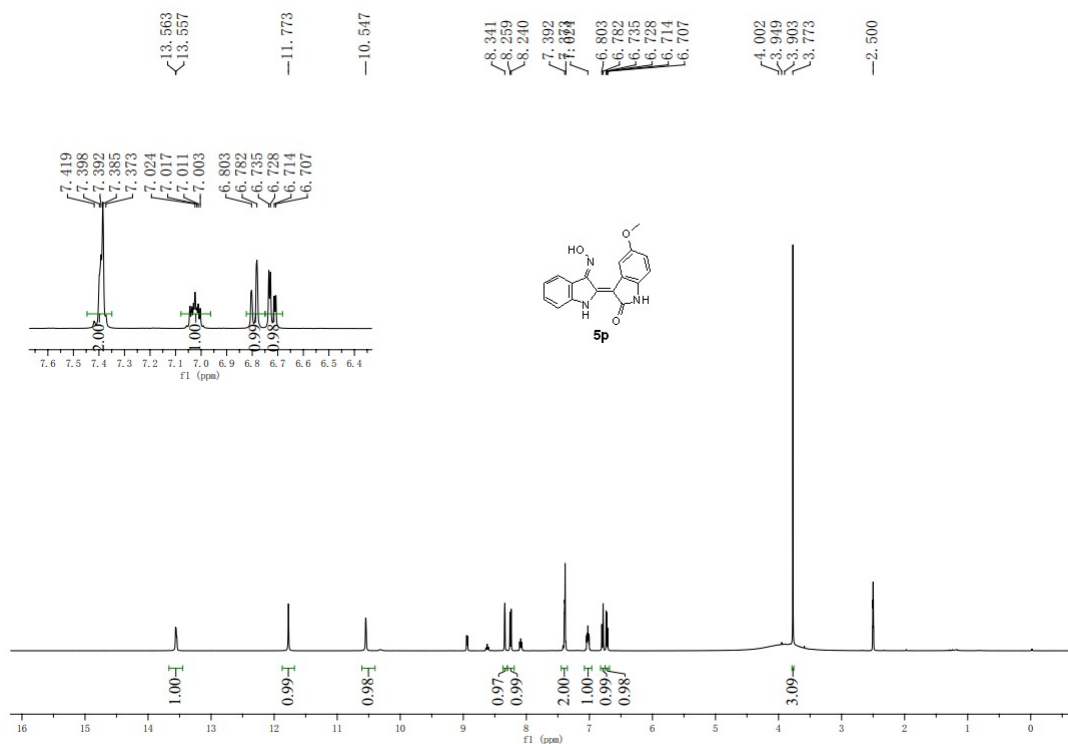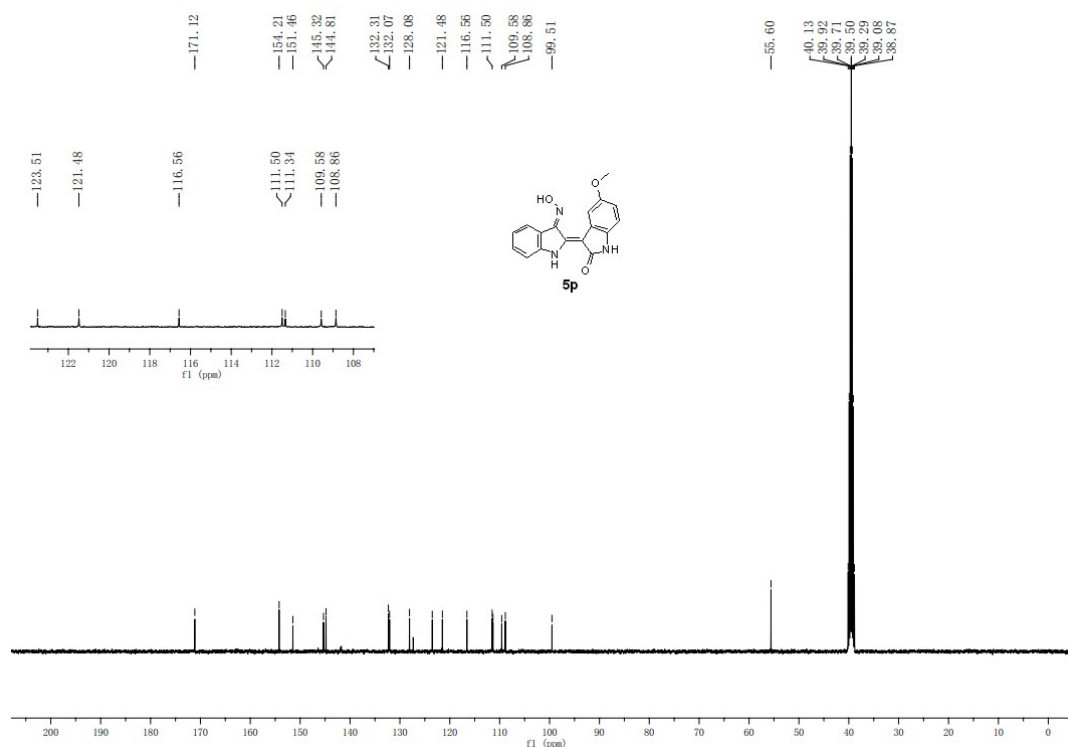

**(2*Z*, 3*E*)-3-(hydroxyimino)-5'-nitro-[2, 3'-biindolinylidene]-2'-one (5q):**

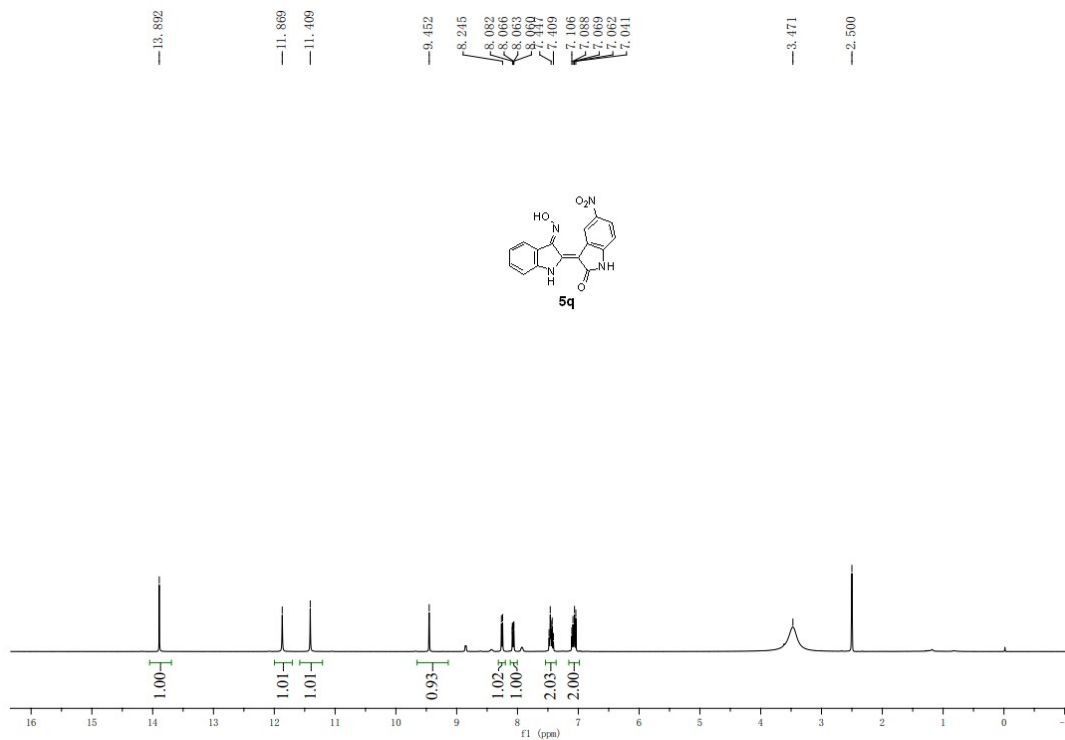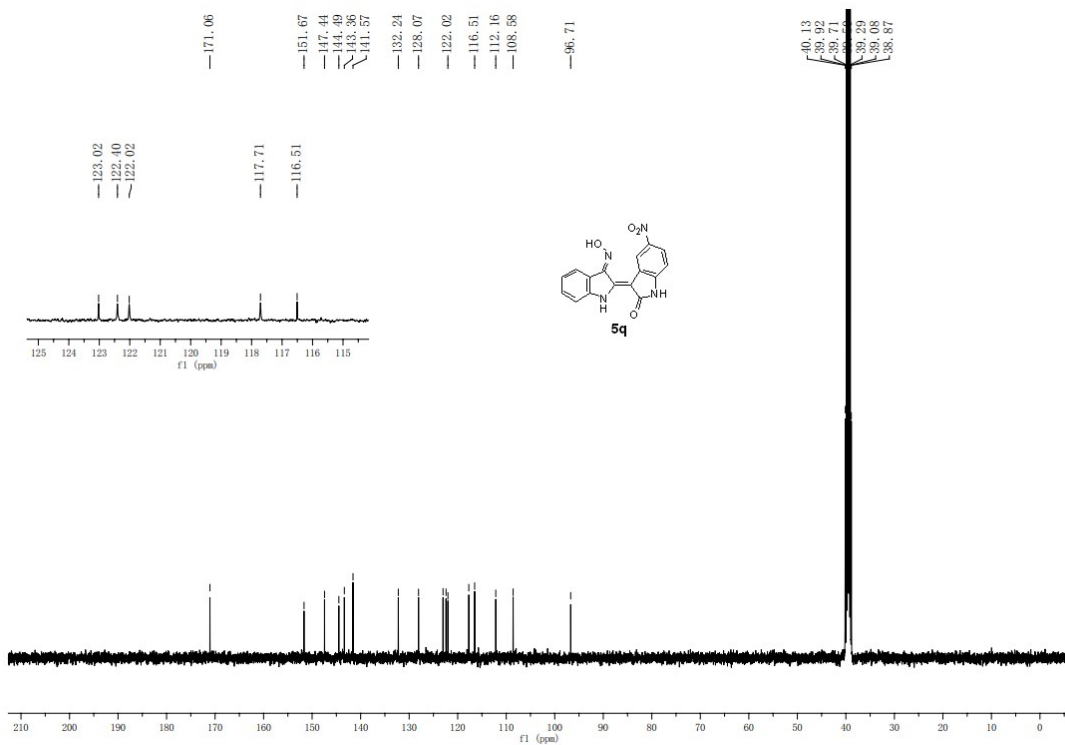

**(2Z, 3E)-5'-fluoro-3-(hydroxyimino)-[2, 3'-biindolinylidene]-2'-one (5r):**

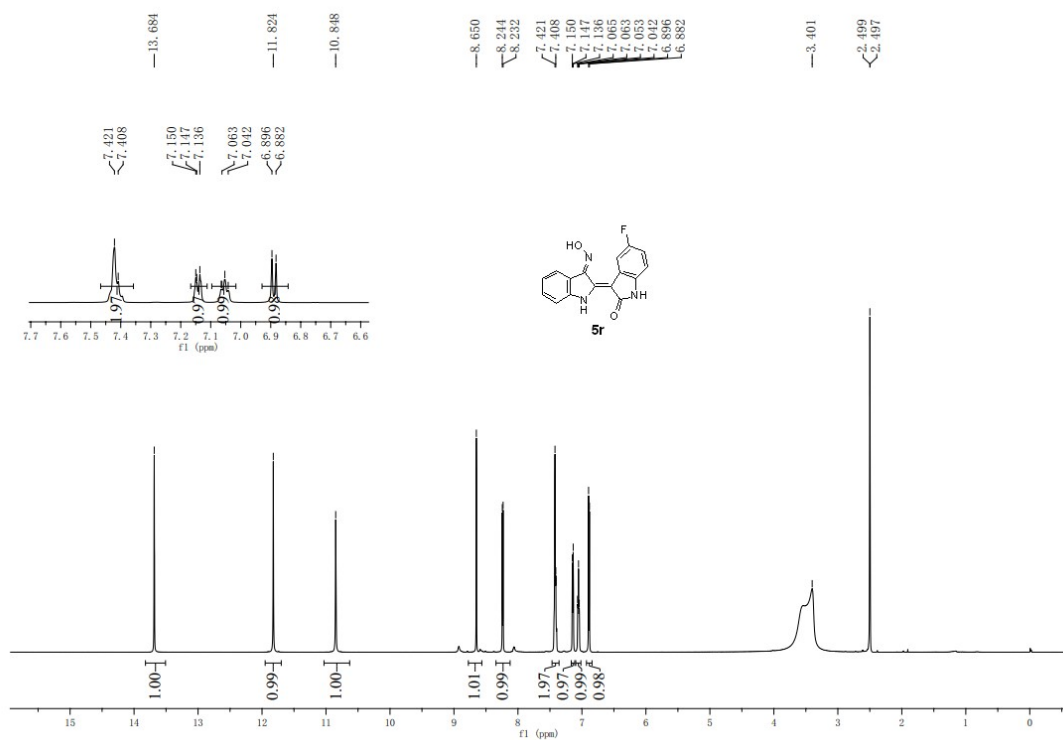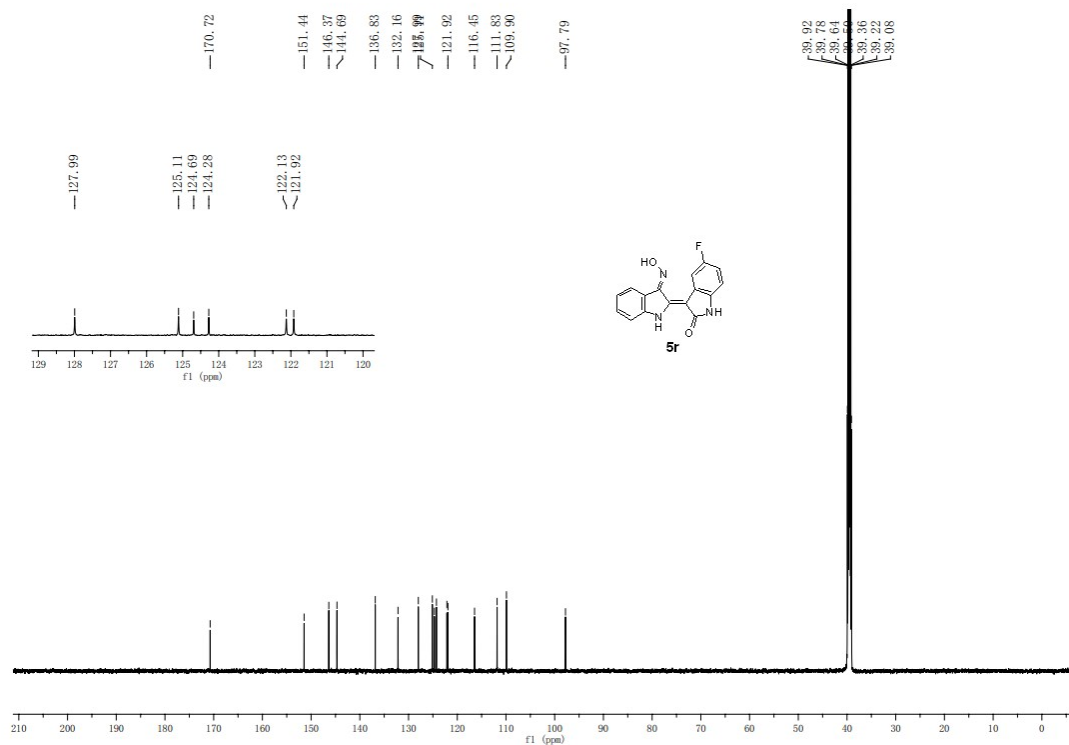

**(2Z, 3E)-5'-chloro-3-(hydroxyimino)-[2, 3'-biindolylidene]-2'-one (5s):**

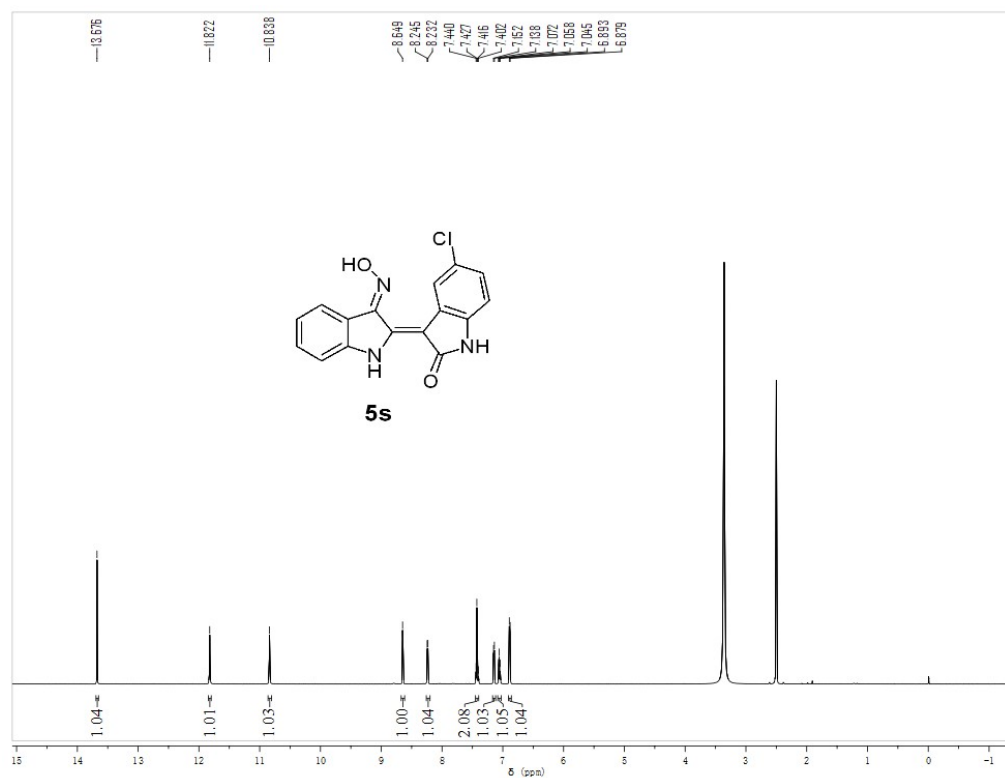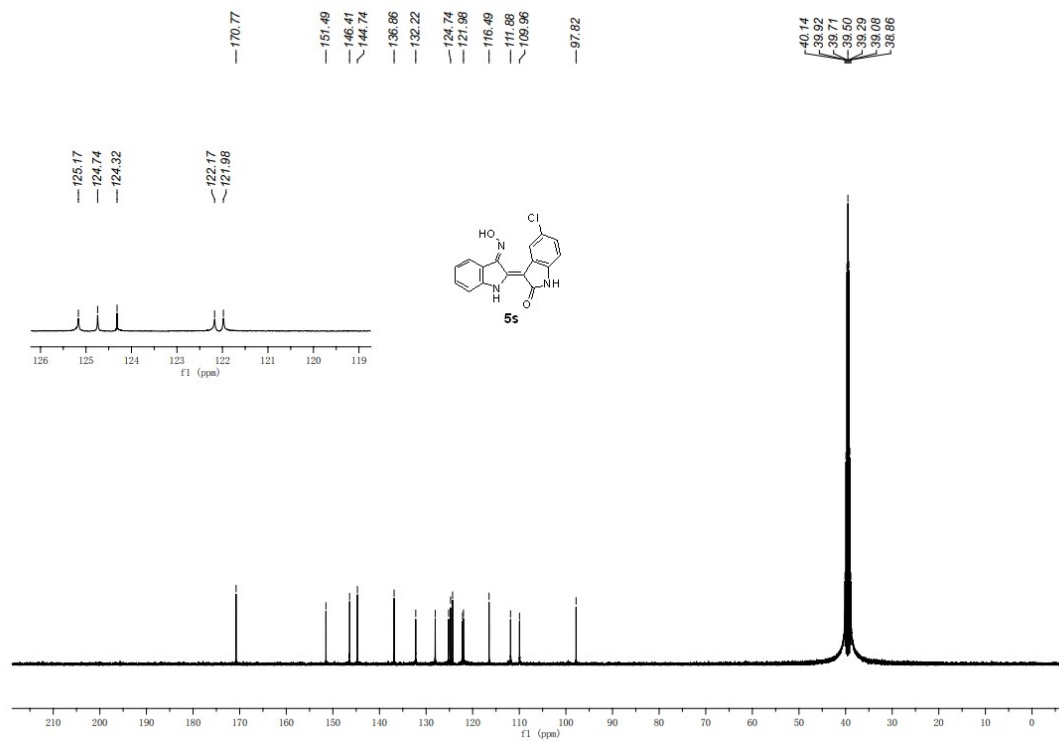

**(2Z, 3E)-5'-bromo-3-(hydroxyimino)-[2, 3'-biindolinylidene]-2'-one (5t):**

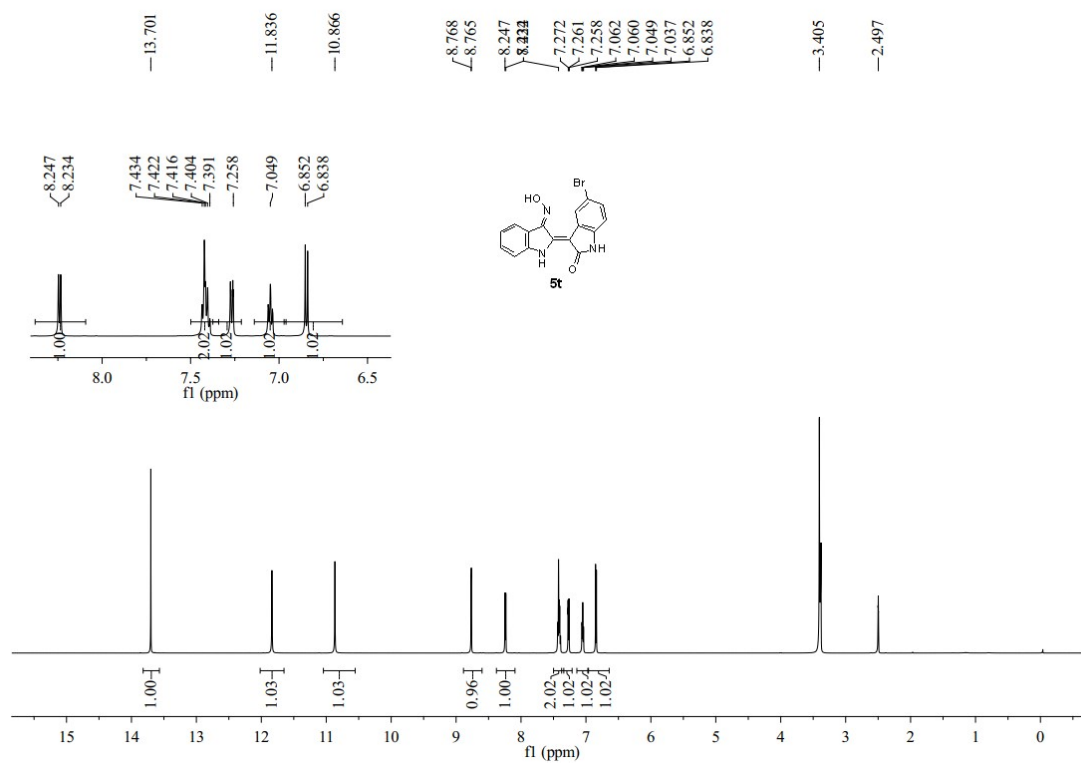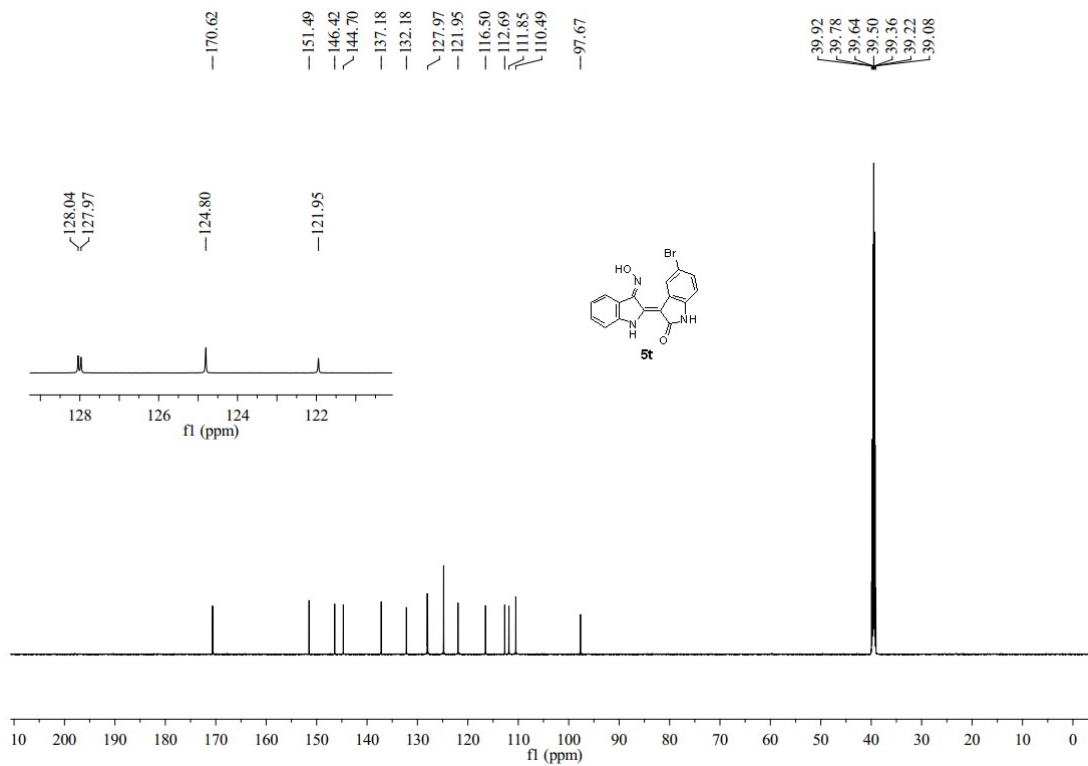

**(2*Z*, 3*E*)-3-(hydroxyimino)-5'-iodo-[2, 3'-biindolinylidene]-2'-one (5u):**

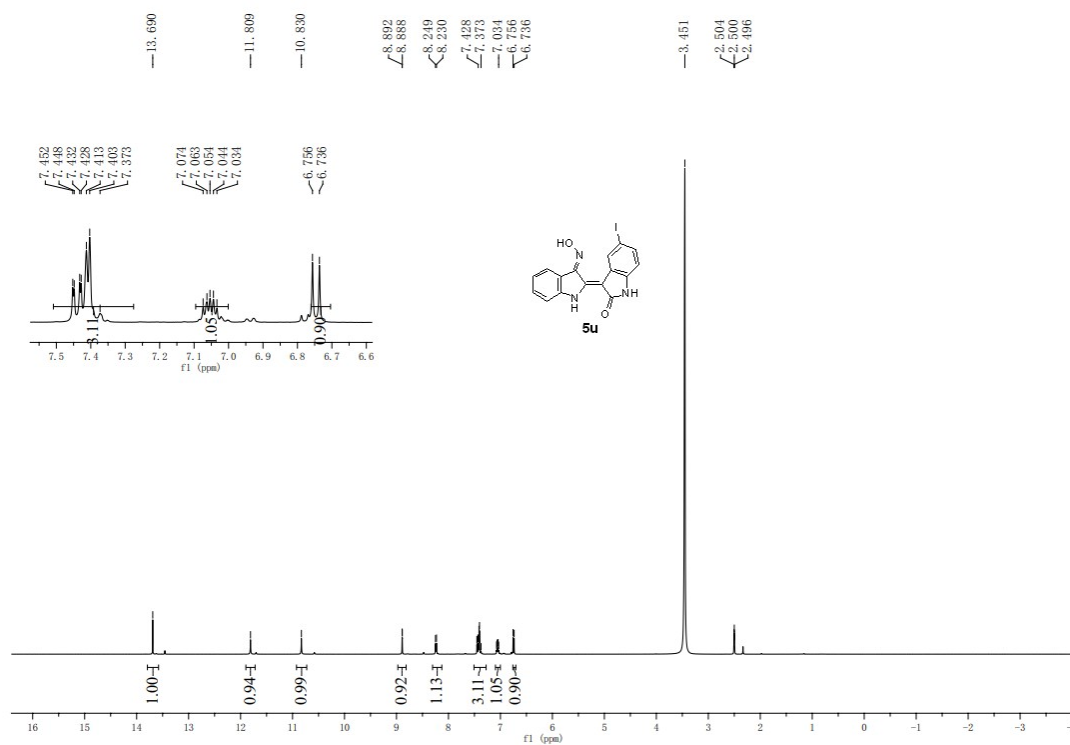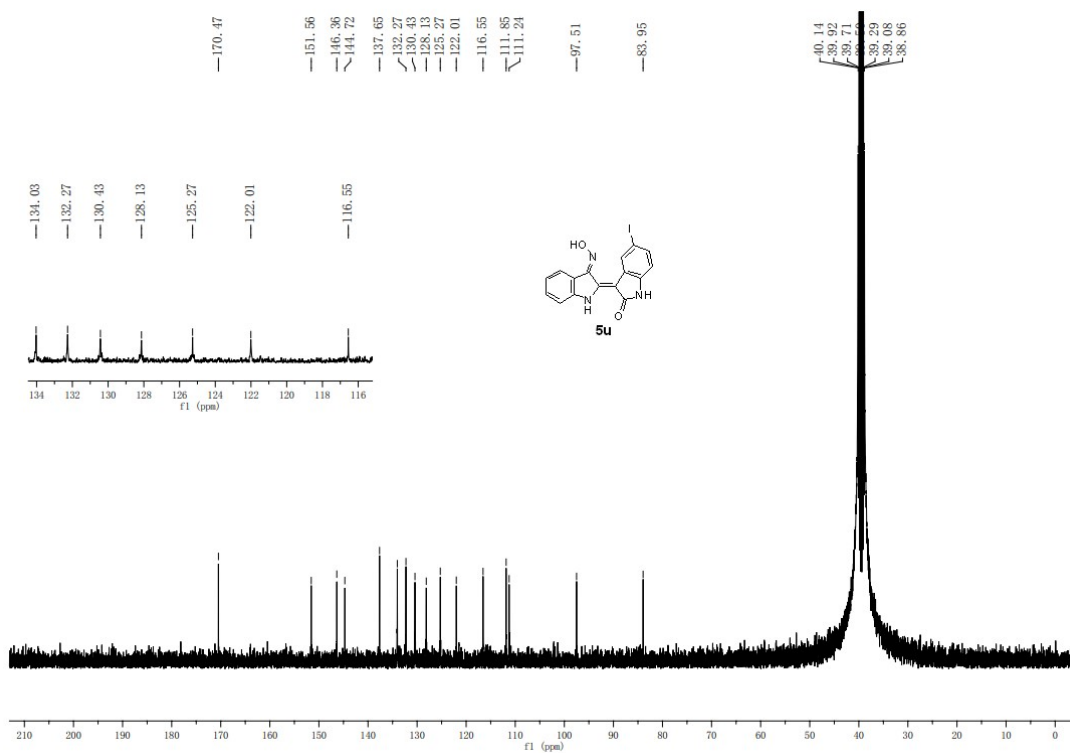

**(2Z, 3E)-3-(hydroxyimino)-6'-methoxy-[2, 3'-biindolinylidene]-2'-one (5v):**

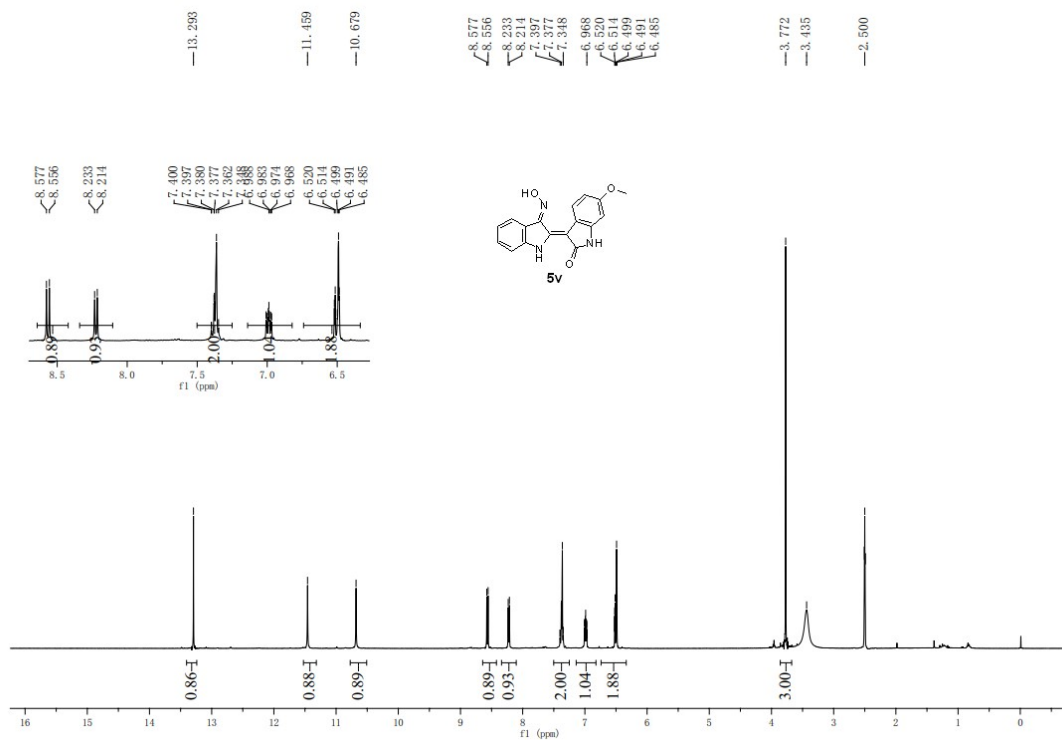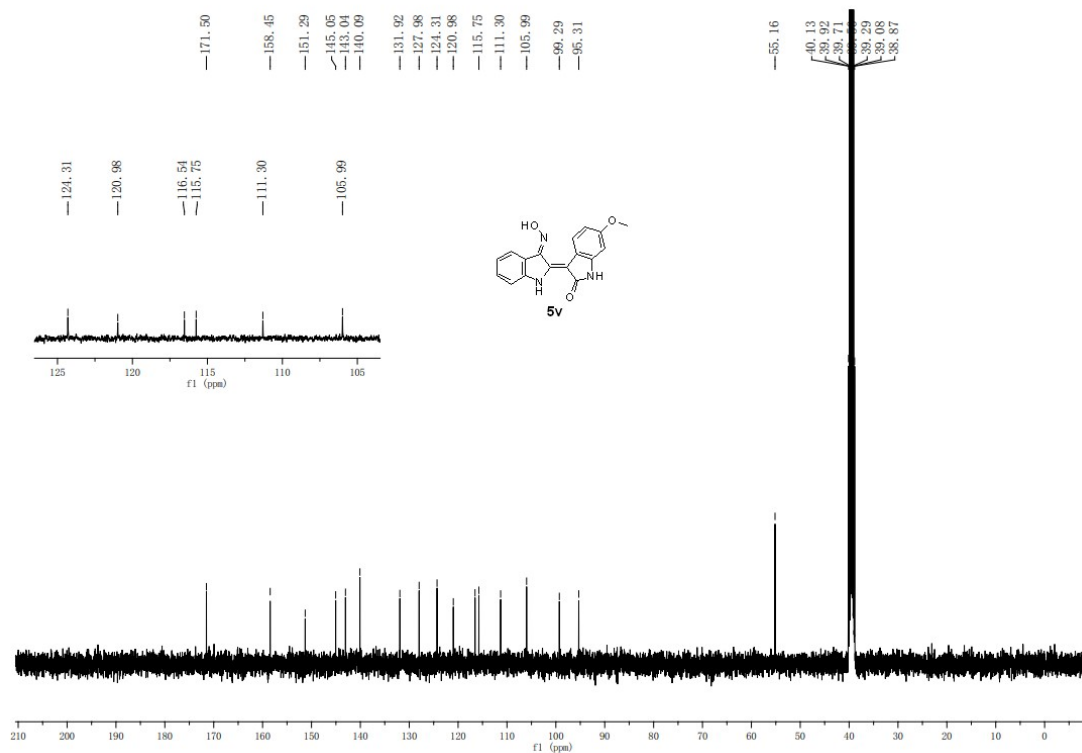

**(2Z, 3E)-3-(hydroxyimino)-7'-methyl-[2, 3'-biindolinylidene]-2'-one (5w):**

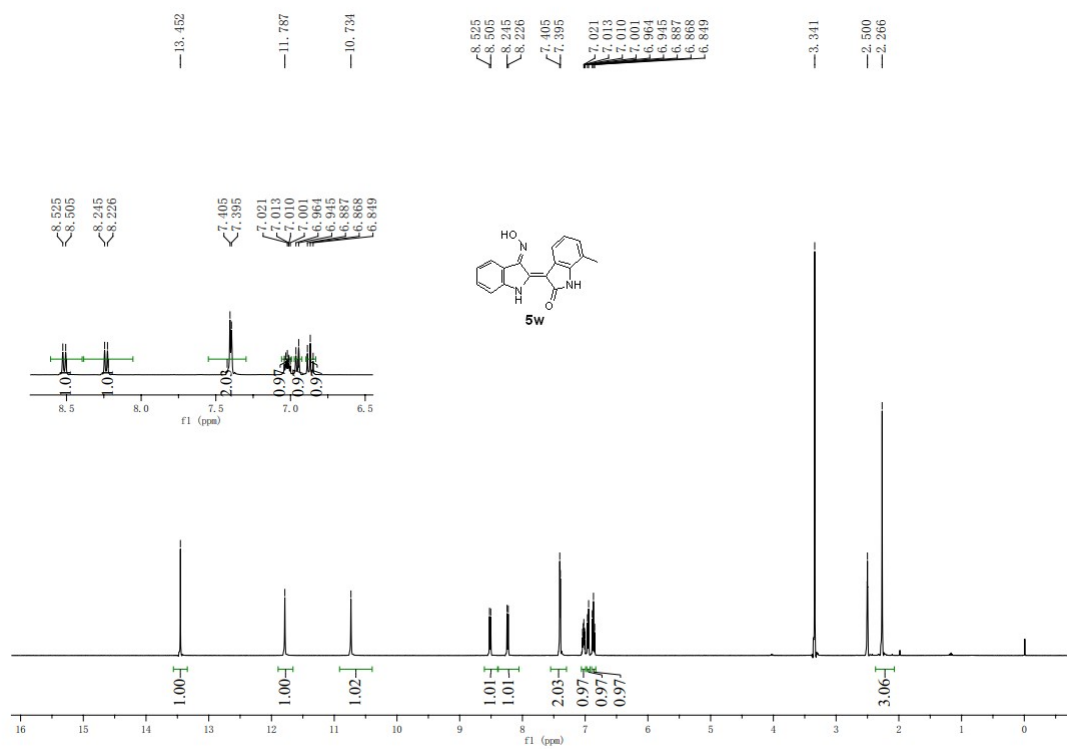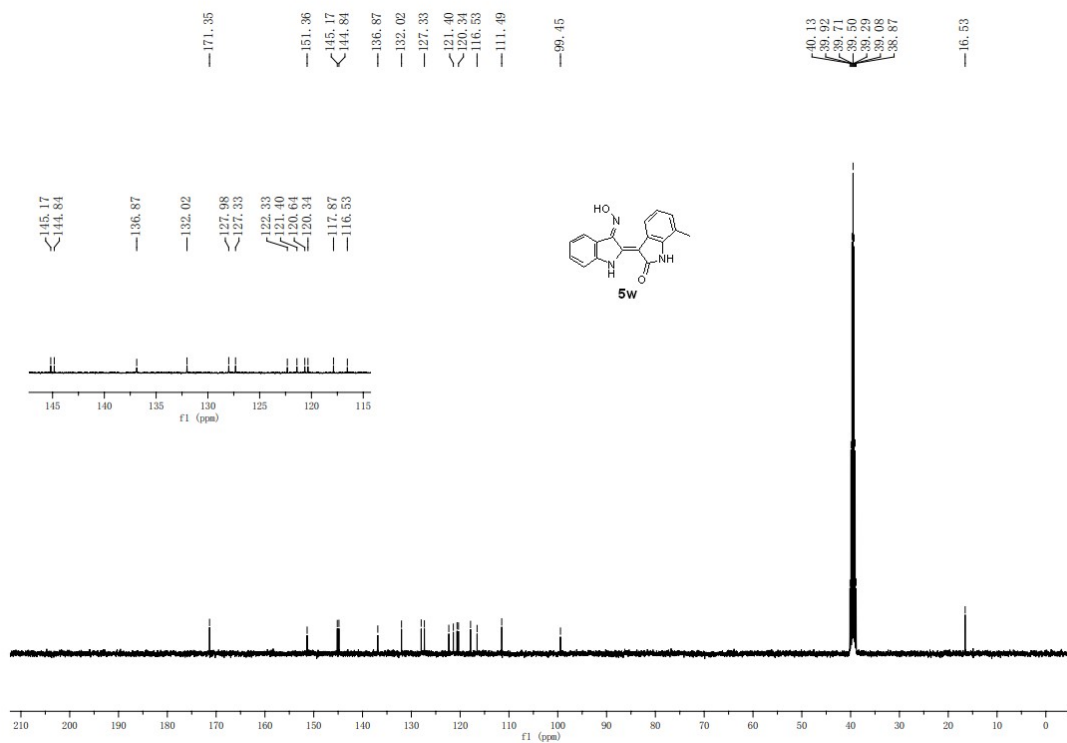



**(2Z, 3E)-7'-fluoro-3-(hydroxyimino)-[2, 3'-biindolinylidene]-2'-one (5x):**

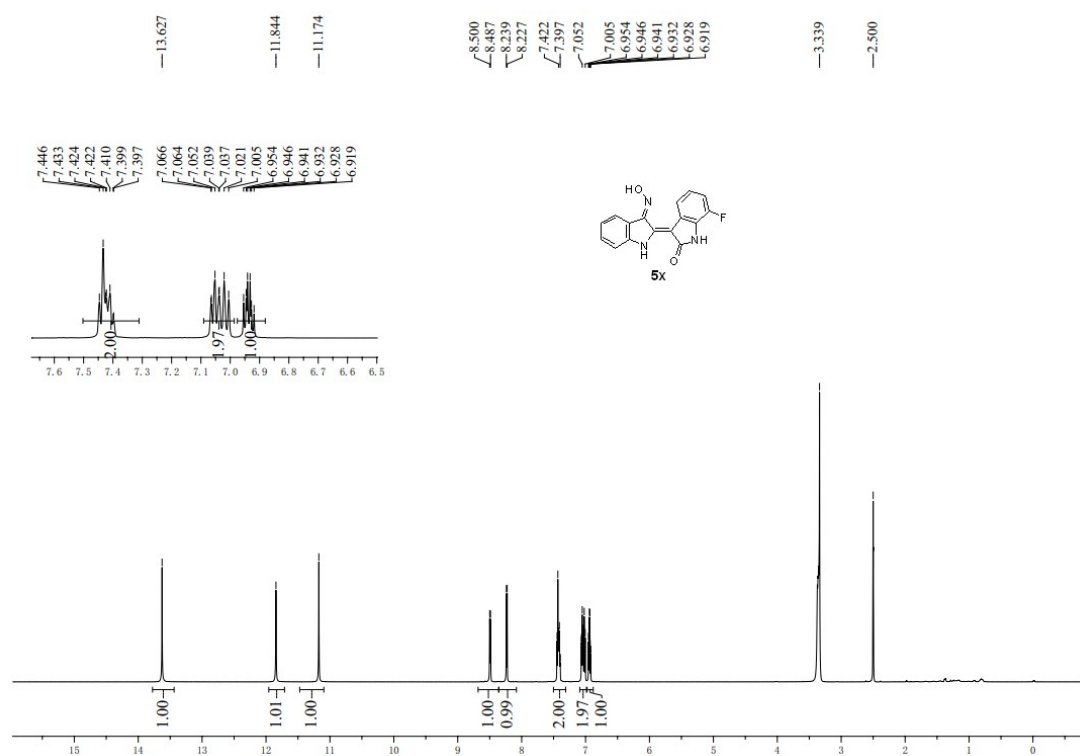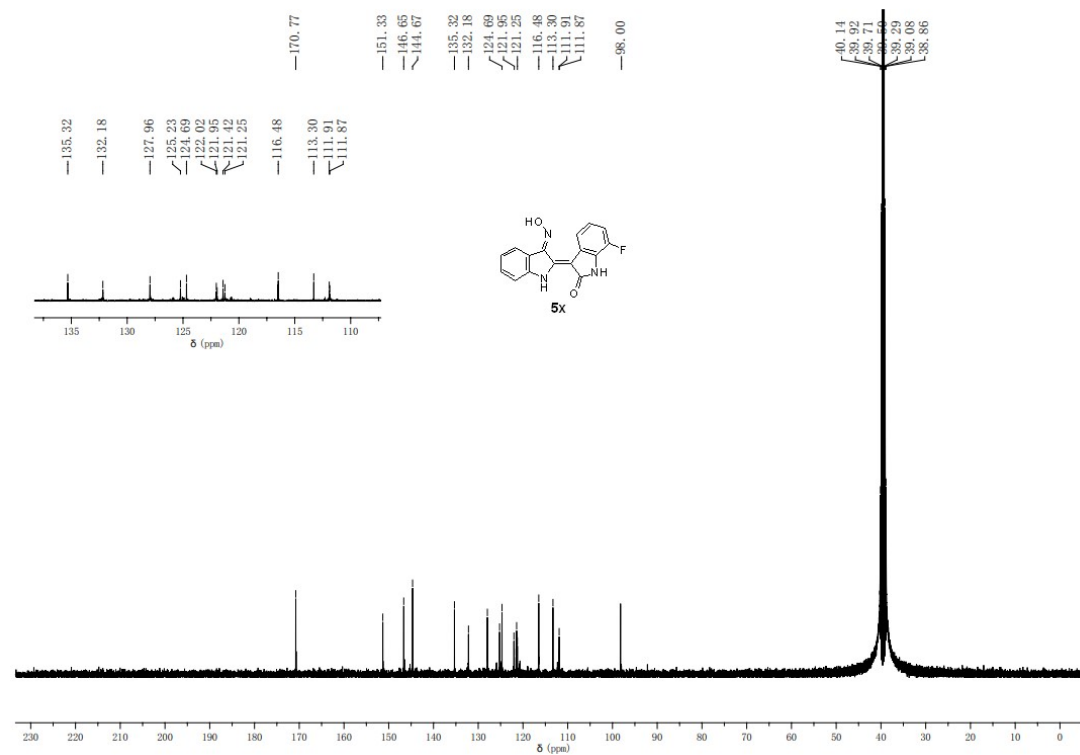

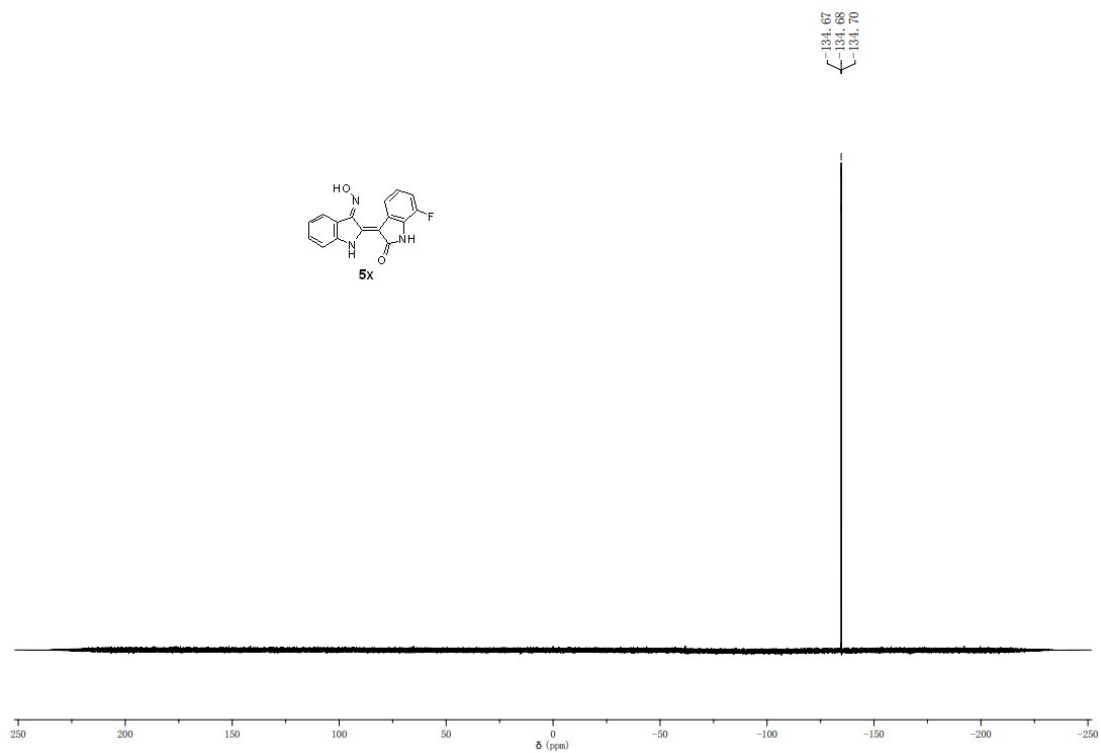

**(2Z, 3E)-7'-chloro-3-(hydroxyimino)-[2, 3'-biindolinylidene]-2'-one (5y):**

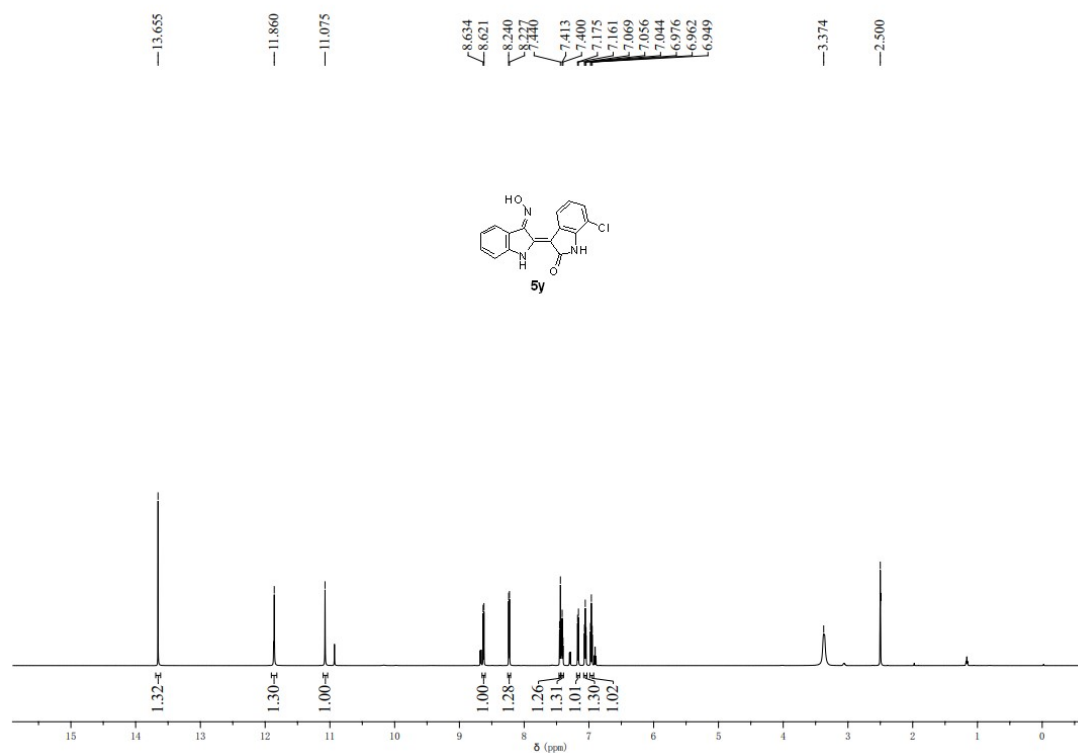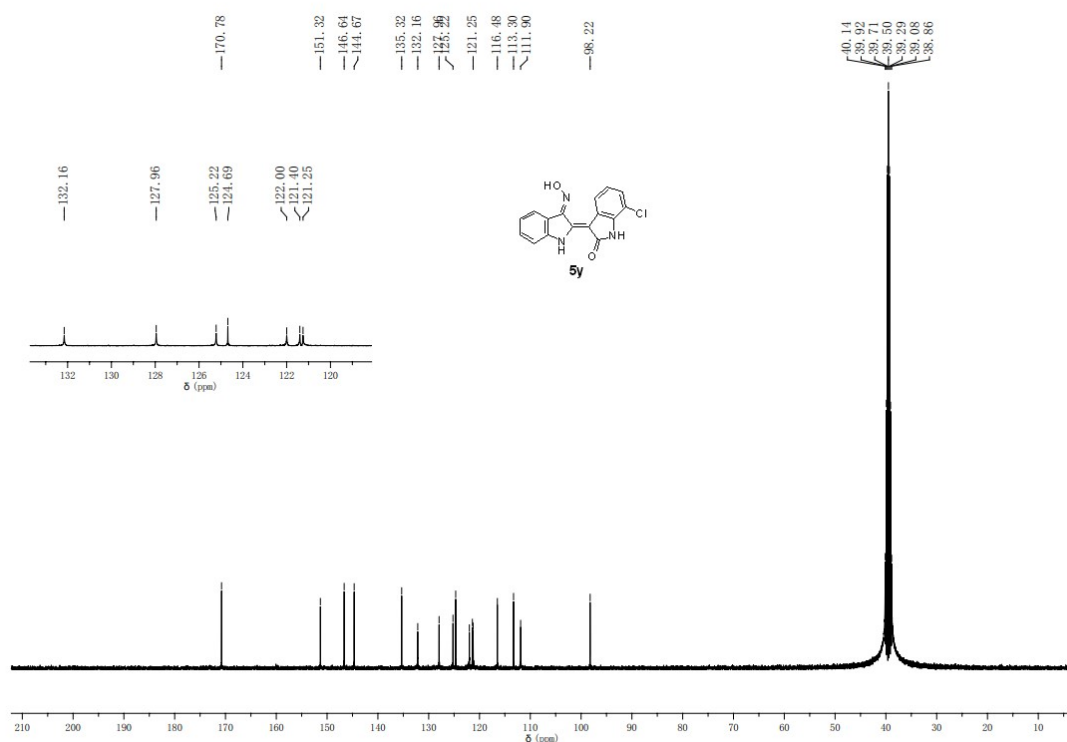

(2Z, 3E)-7'-bromo-3-(hydroxyimino)-[2, 3'-biindolinylidene]-2'-one (5z):

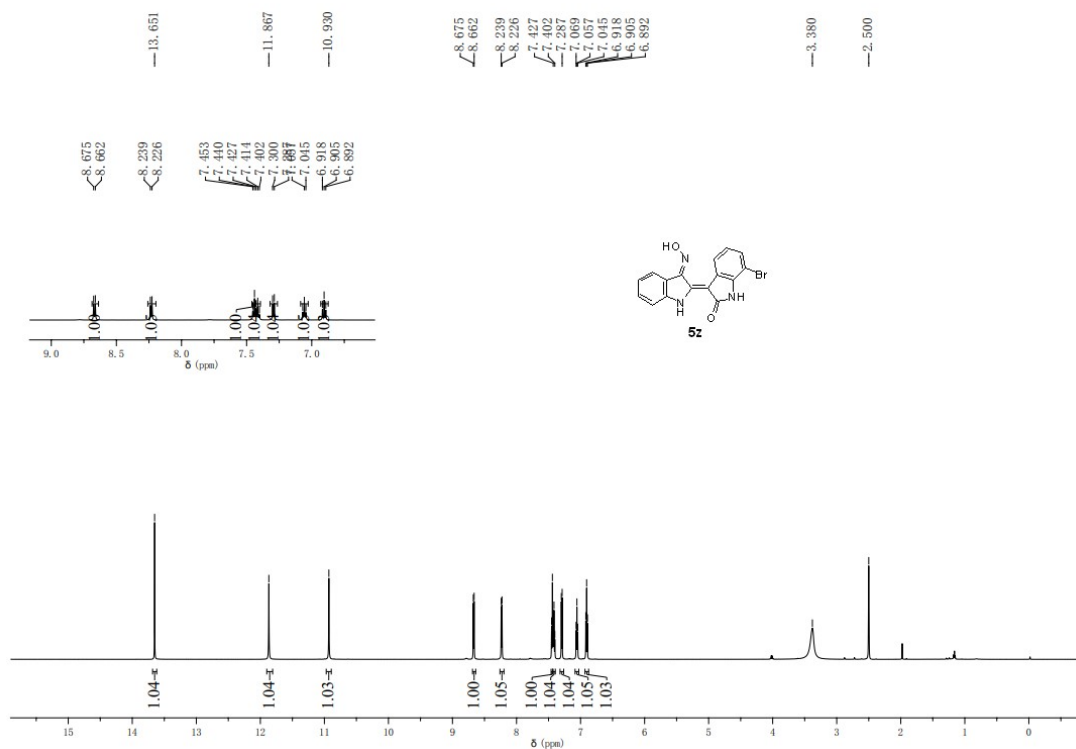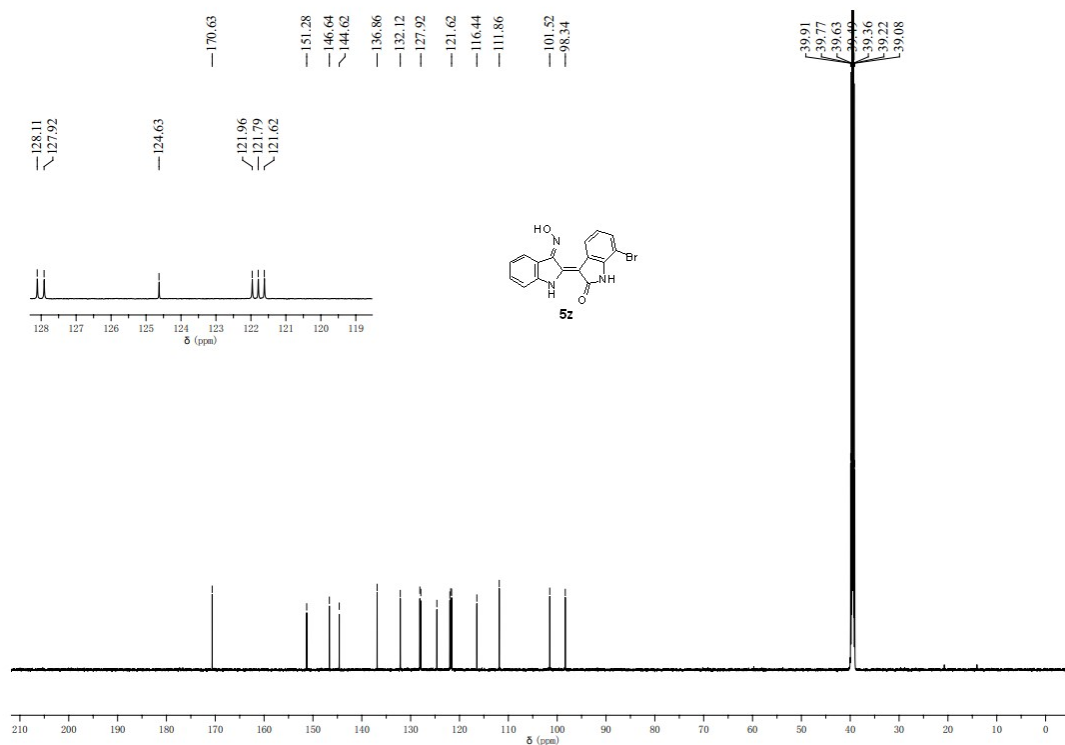

**(2Z, 3E)-3-(hydroxyimino)-7'-(trifluoromethyl)-[2, 3'-biindolinylidene]-2'-one (5aa):**

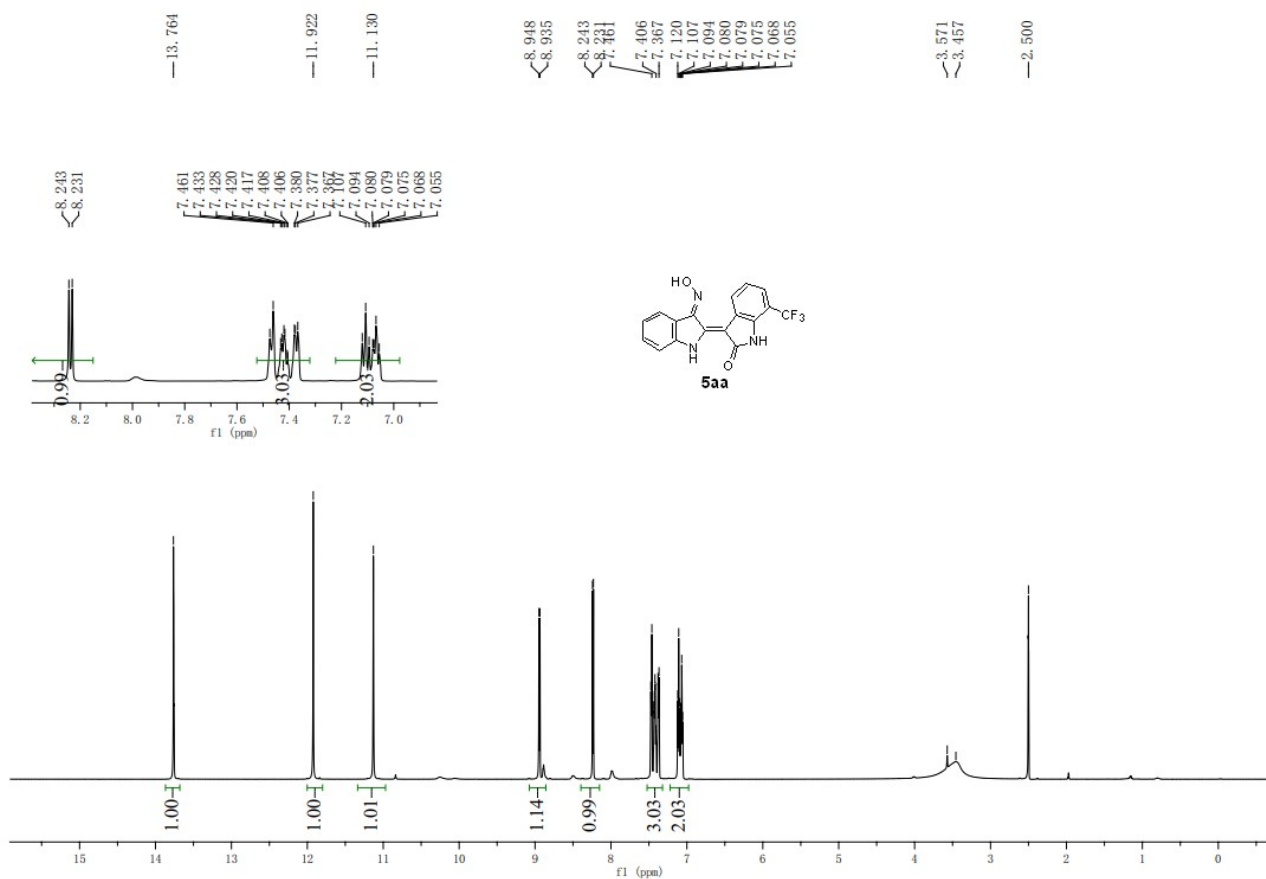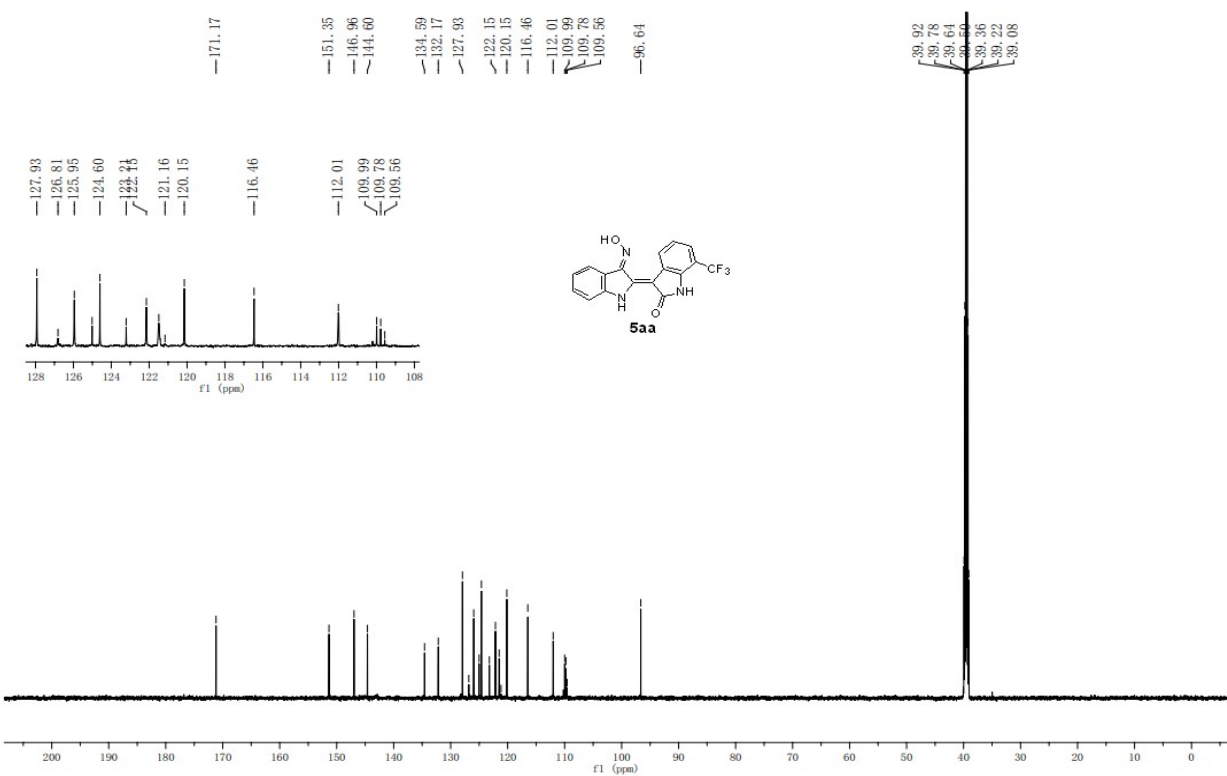

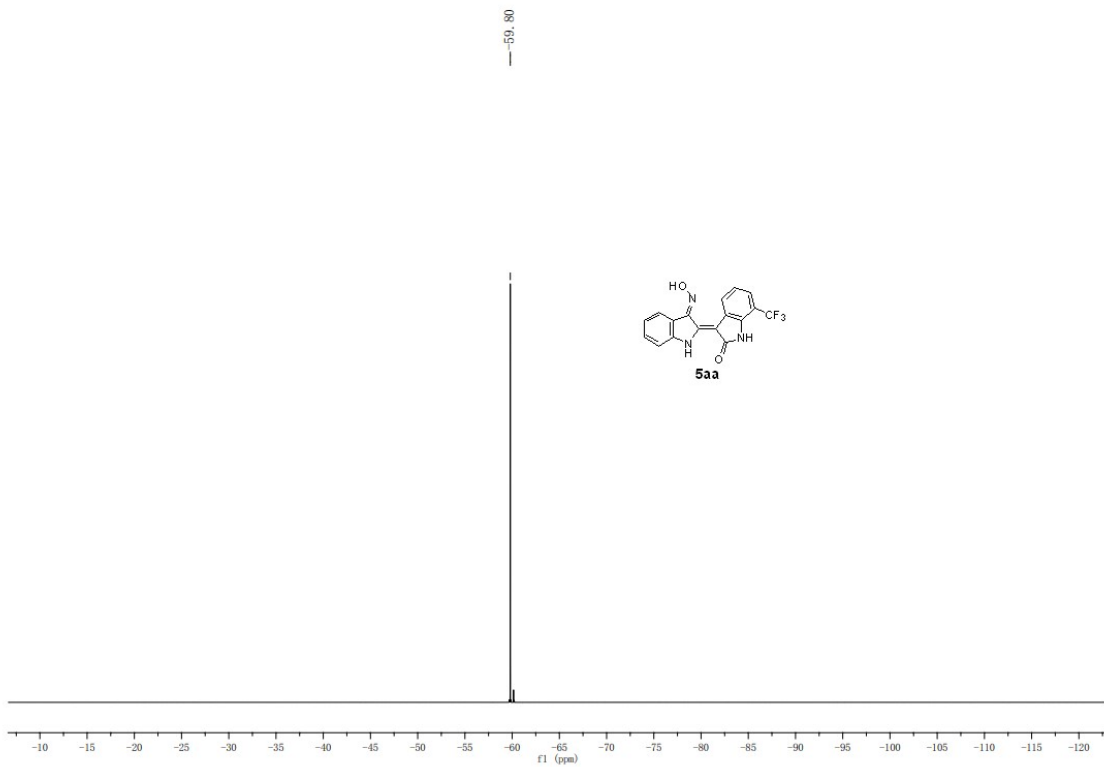

**(2Z,3E)-3-(hydroxyimino)-5-methoxy-7'-(trifluoromethyl)-[2,3'-biindolinylidene]-2'-one (5ab)**

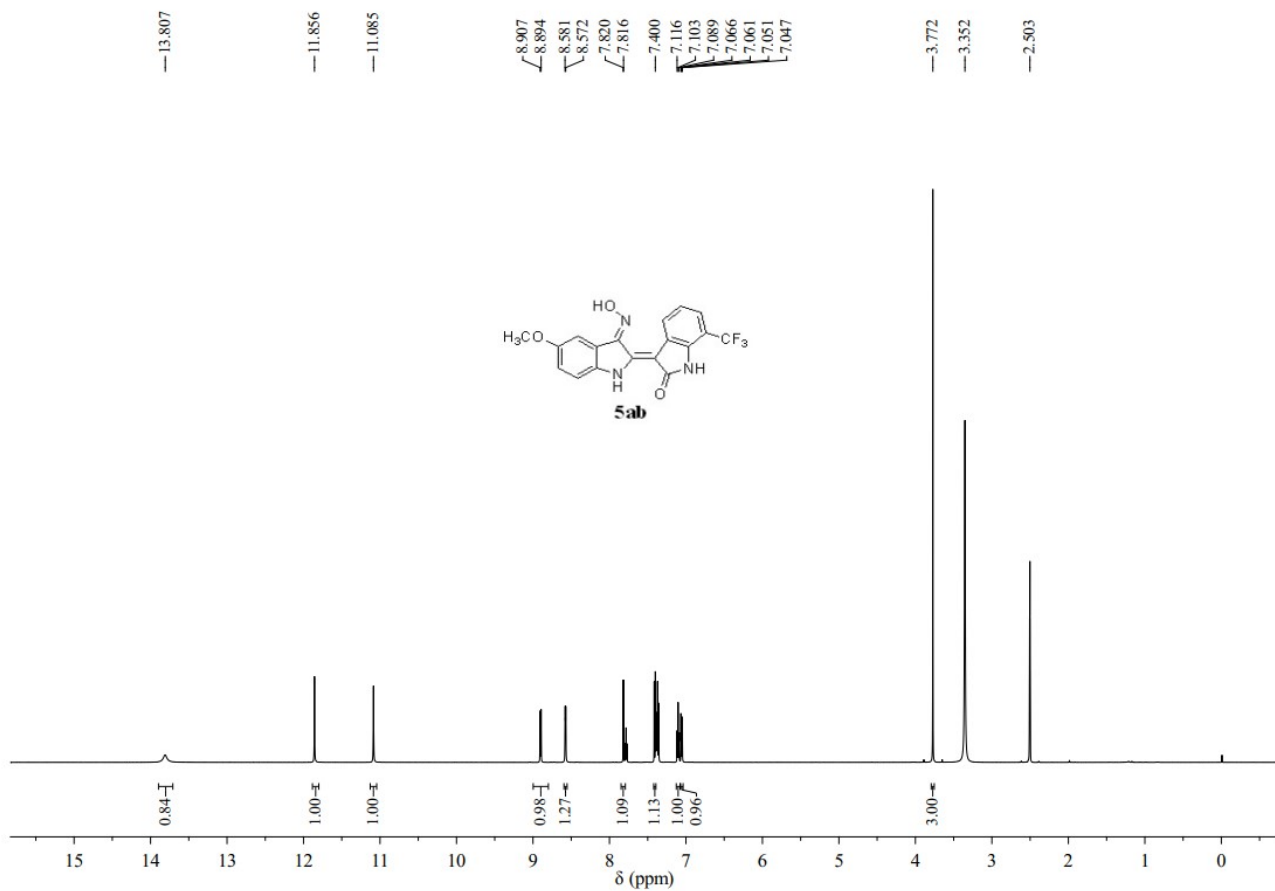

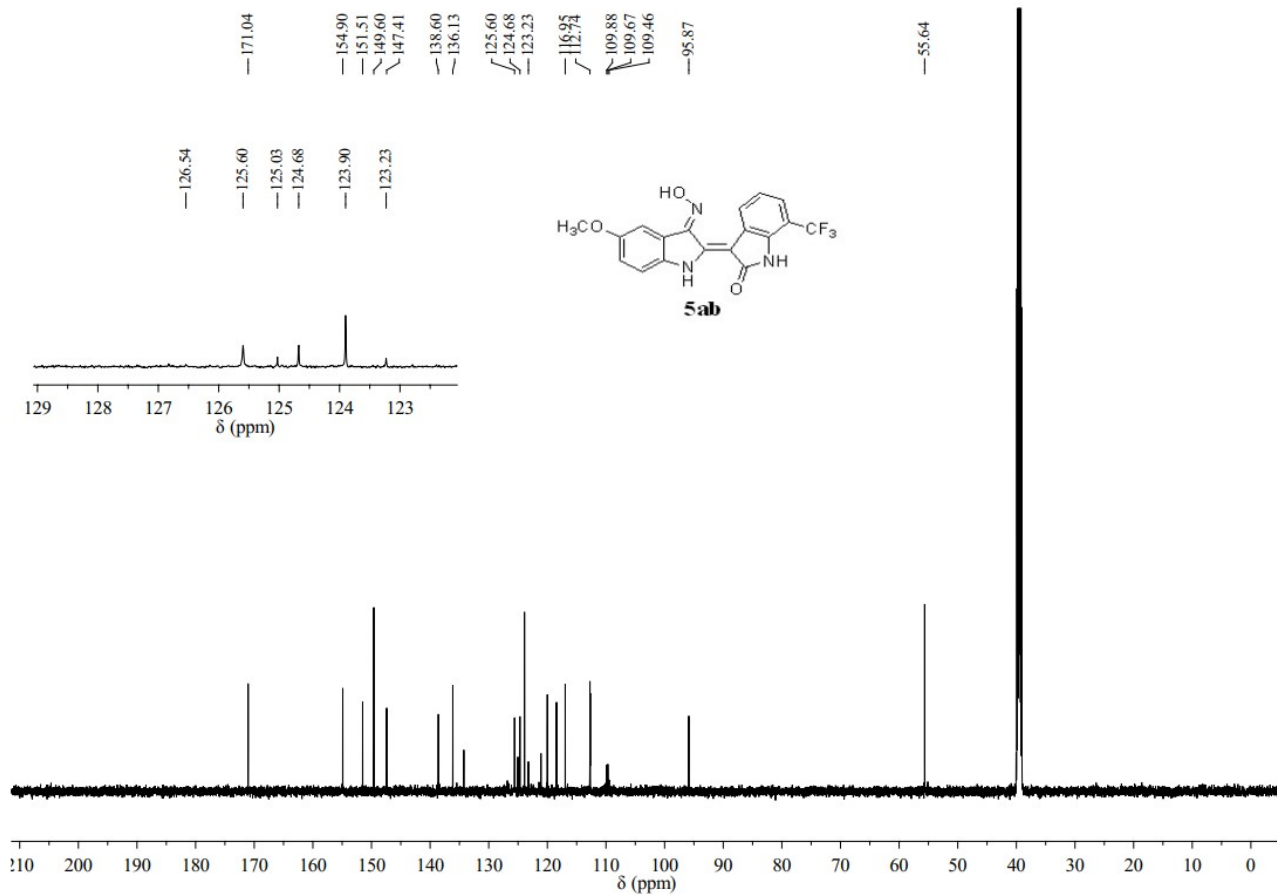

**(2Z,3E)-5-chloro-3-(hydroxyimino)-7'-(trifluoromethyl)-[2,3'-biindolinyldene]-2'-one (5ac)**

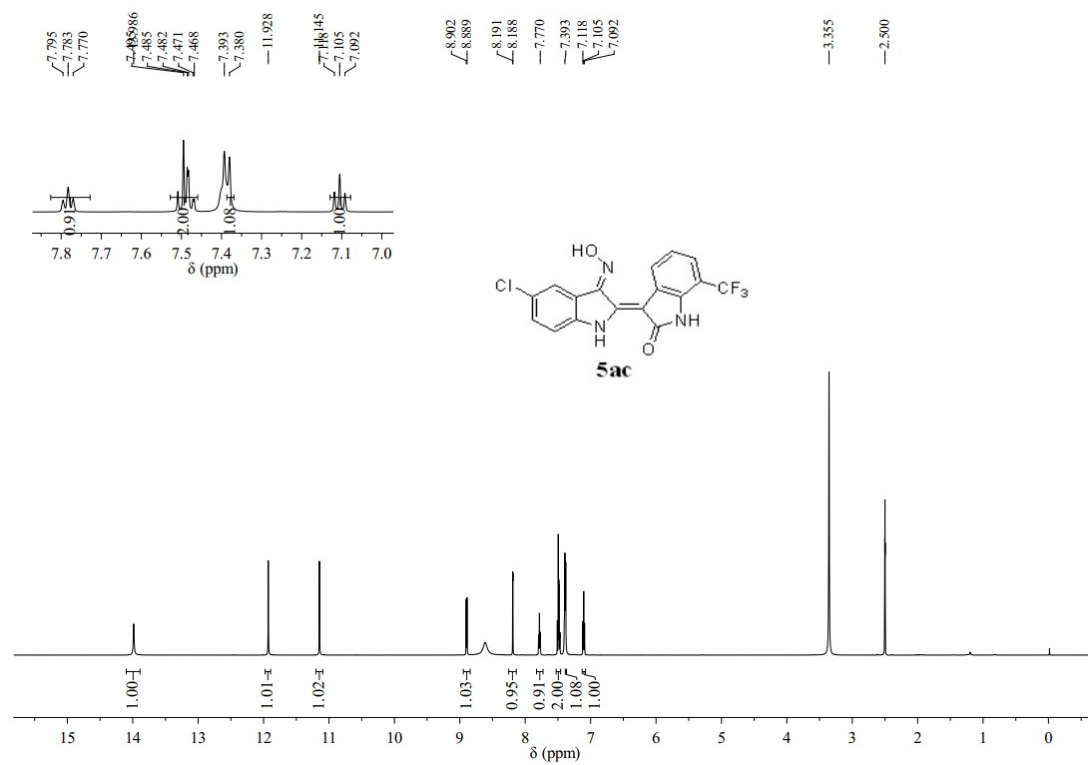

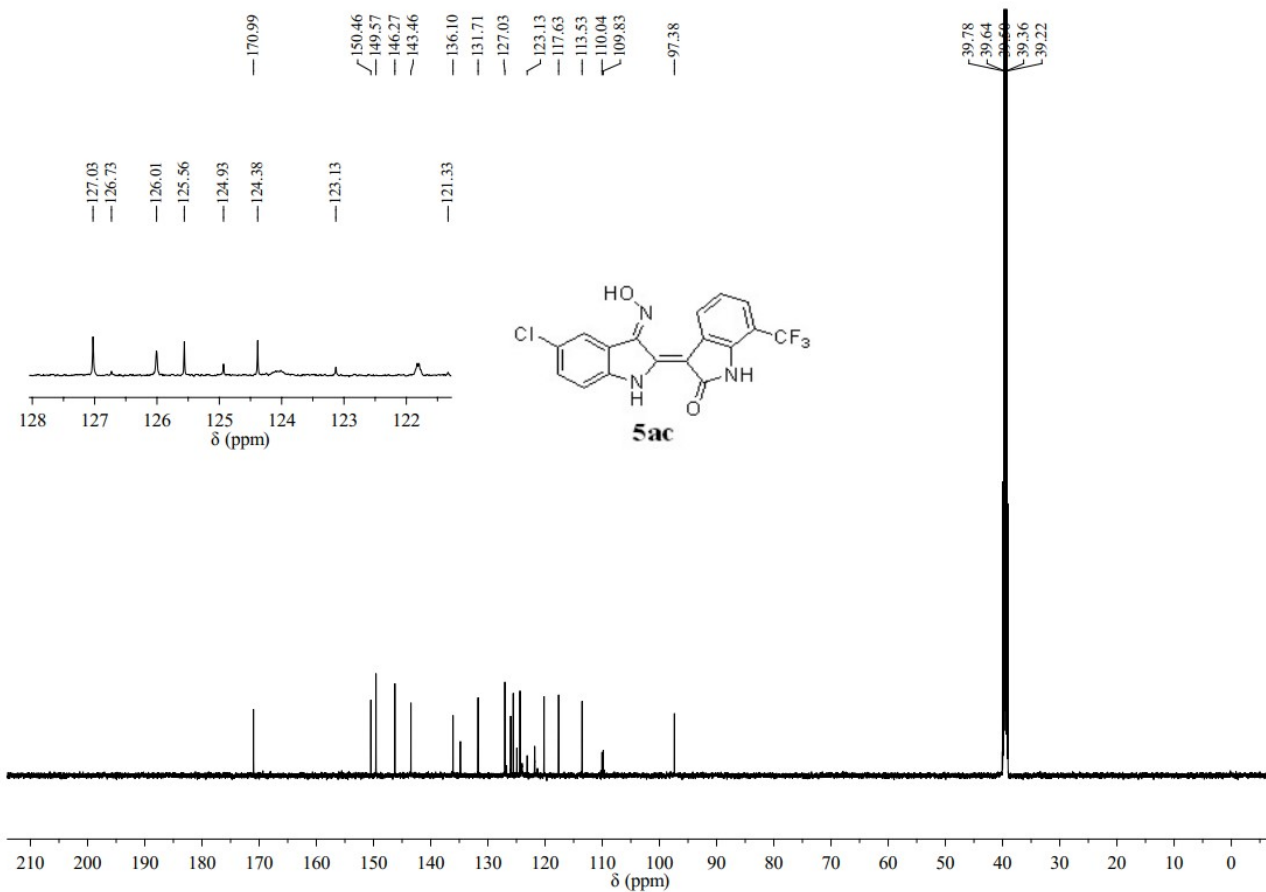

(2*Z*, 3*E*)-5-bromo-3-(hydroxyimino)-7'-(trifluoromethyl)-[2, 3'-biindolylidene]-2'-one (**5ad**)

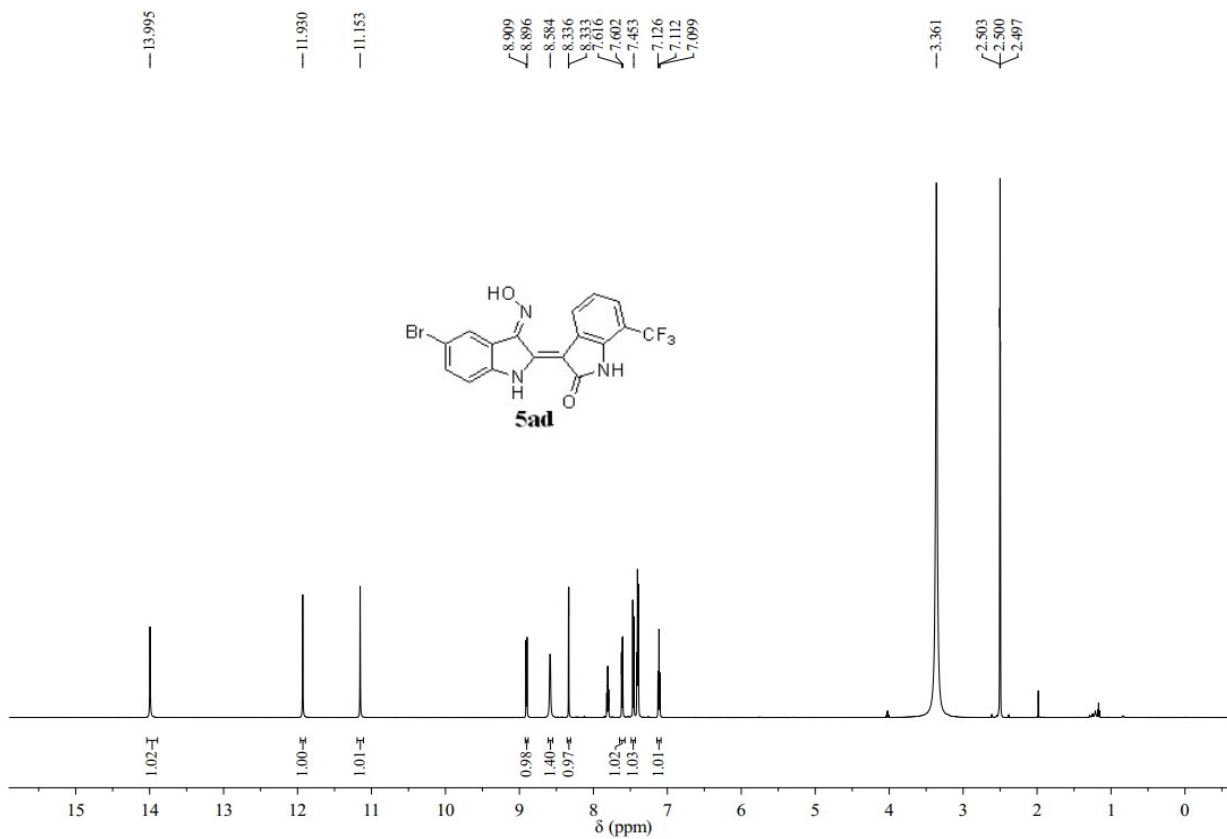



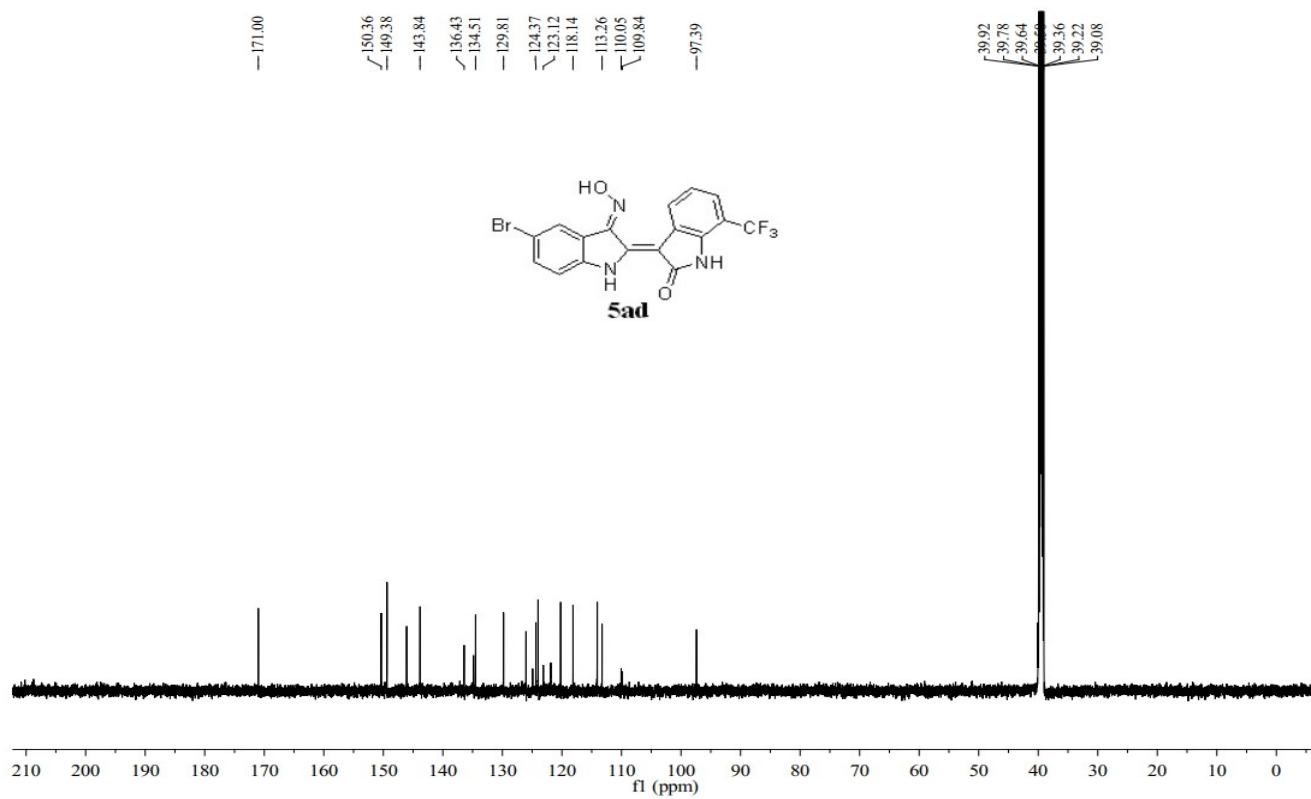

**HPLC purity analysis for compound 5r using an InertSustain AQ-C18 5 $\mu$ m 4.6 $\times$  250 mm**

**Column (0.1%TFA/CH<sub>3</sub>CN: 0.1%TFA/dd H<sub>2</sub>O = 5:95, 1mL/min)**

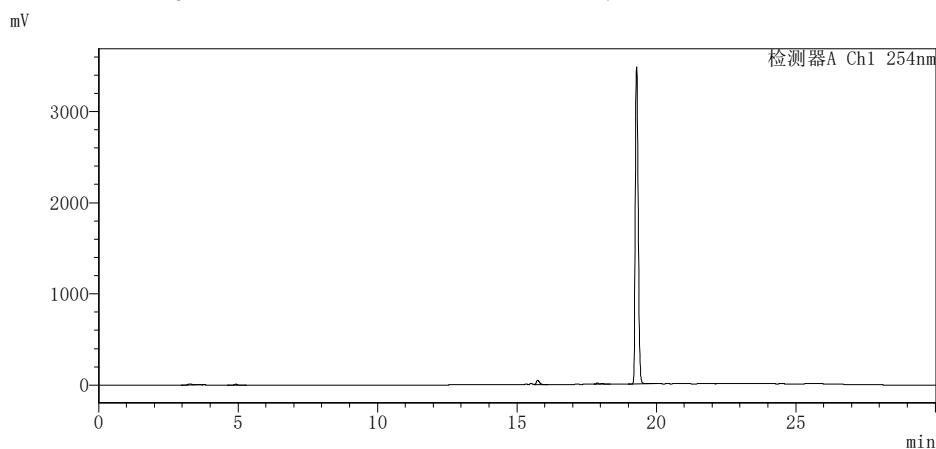

| Peak  | Retention Time (min) | Peak Area (mAU*s) | Peak Hight (mAU) | Peak Area (%) |
|-------|----------------------|-------------------|------------------|---------------|
| 1     | 3.276                | 139911            | 12982            | 0.537         |
| 2     | 4.925                | 69591             | 12096            | 0.267         |
| 3     | 15.743               | 342766            | 45495            | 1.316         |
| 4     | 17.880               | 148921            | 14265            | 0.572         |
| 5     | 19.294               | 25353283          | 3478944          | 97.309        |
| total |                      | 26054473          | 3563781          | 100.000       |

**HPLC purity analysis for compound 5s using an InertSustain AQ-C18 5 $\mu$ m 4.6 $\times$  250 mm**

**Column (0.1%TFA/CH<sub>3</sub>CN: 0.1%TFA/dd H<sub>2</sub>O = 5:95, 1mL/min)**

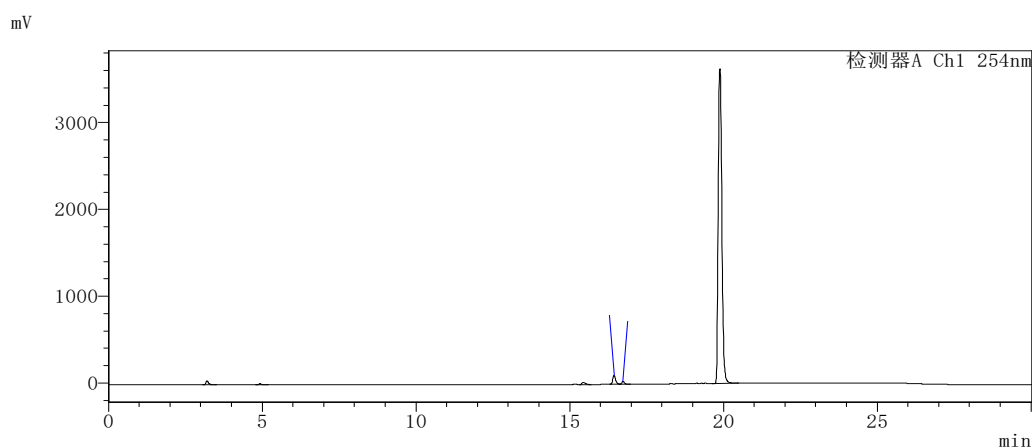

| Peak | Retention Time (min) | Peak Area (mAU*s) | Peak Hight (mAU) | Peak Area (%) |
|------|----------------------|-------------------|------------------|---------------|
| 1    | 3.205                | 269413            | 46130            | 0.860         |
| 2    | 4.932                | 62428             | 16190            | 0.199         |
| 3    | 15.435               | 182903            | 25459            | 0.584         |
| 4    | 16.442               | 653007            | 104053           | 2.084         |
| 5    | 16.733               | 164175            | 31511            | 0.524         |

|       |        |          |         |         |
|-------|--------|----------|---------|---------|
| 6     | 19.885 | 30003065 | 3625014 | 95.749  |
| total |        | 31334991 | 3848358 | 100.000 |

**HPLC purity analysis for compound 5aa using an InertSustain AQ-C18 5um 4.6× 250 mm**

**Column (0.1%TFA/CH<sub>3</sub>CN: 0.1%TFA/dd H<sub>2</sub>O = 5:95, 1mL/min)**

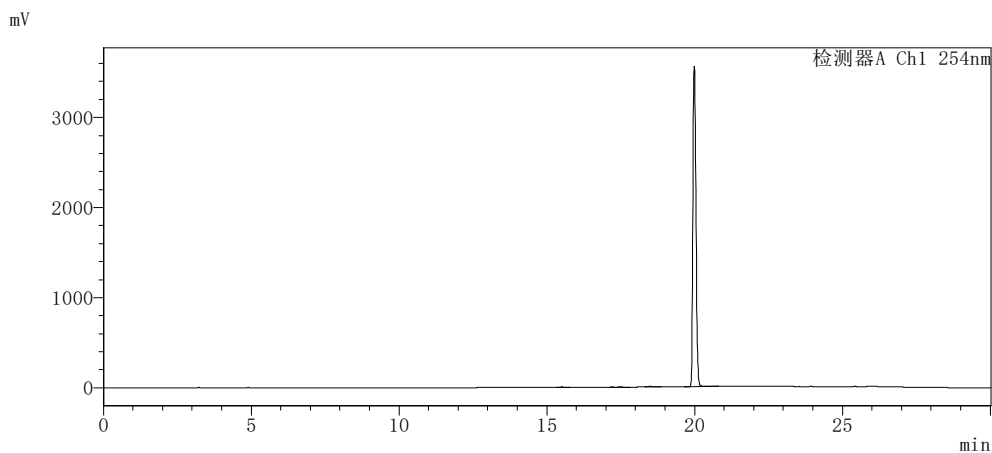

| Peak  | Retention Time (min) | Peak Area (mAU*s) | Peak Hight (mAU) | Peak Area (%) |
|-------|----------------------|-------------------|------------------|---------------|
| 1     | 15.513               | 29355             | 5559             | 0.114         |
| 2     | 17.472               | 45231             | 6842             | 0.175         |
| 3     | 18.489               | 40979             | 6439             | 0.159         |
| 4     | 19.990               | 25668572          | 3558511          | 99.552        |
| total |                      | 25784138          | 3577351          | 100.000       |

## Bacterial activity results

**Table S1.** In vitro antibacterial activity of indirubin-3'-monoximes used alone or in combination with Levofloxacin against *P. aeruginosa* ATCC9027 by the checkerboard microdilution assay.

|                        | Compound |            | Lev   |            | FICI <sup>a</sup> | Interpretation |
|------------------------|----------|------------|-------|------------|-------------------|----------------|
|                        | alone    | synergetic | alone | synergetic |                   |                |
| Indirubin( <b>4a</b> ) | 256      | 256        | 12.5  | 12.5       | 2                 | Indifferent    |
| <b>5r</b>              | 256      | 256        | 12.5  | 6.25       | 1.5               | Indifferent    |
| <b>5s</b>              | 256      | 256        | 12.5  | 12.5       | 2                 | Indifferent    |
| <b>5aa</b>             | 256      | 256        | 12.5  | 12.5       | 2                 | Indifferent    |

<sup>a</sup> The interaction as reflected by FICI values: synergistic ( $FICI \leq 0.5$ ), additive ( $0.5 < FICI \leq 1$ ), indifferent ( $1 < FICI \leq 4$ ) and antagonistic ( $FICI > 4$ ).

**Transmission electron micrographs (TEM) of *S. aureus* ATCC25923 cells (B: treated with 5aa at 12.8  $\mu\text{g}/\text{mL}$  for 16 h; A: blank control), (magnification, 15000).**

Fluorescence micrographs of *S. aureus* ATCC 29213 cells.

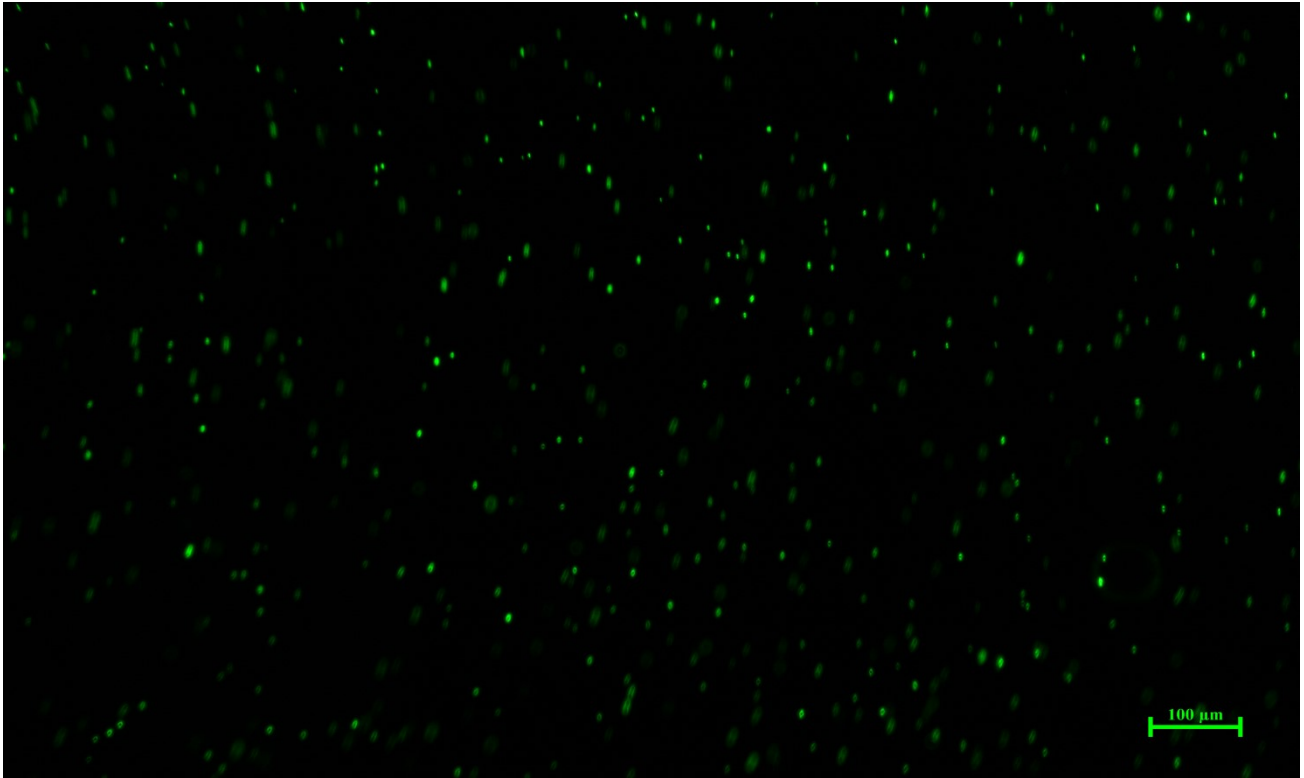

treated with DMSO

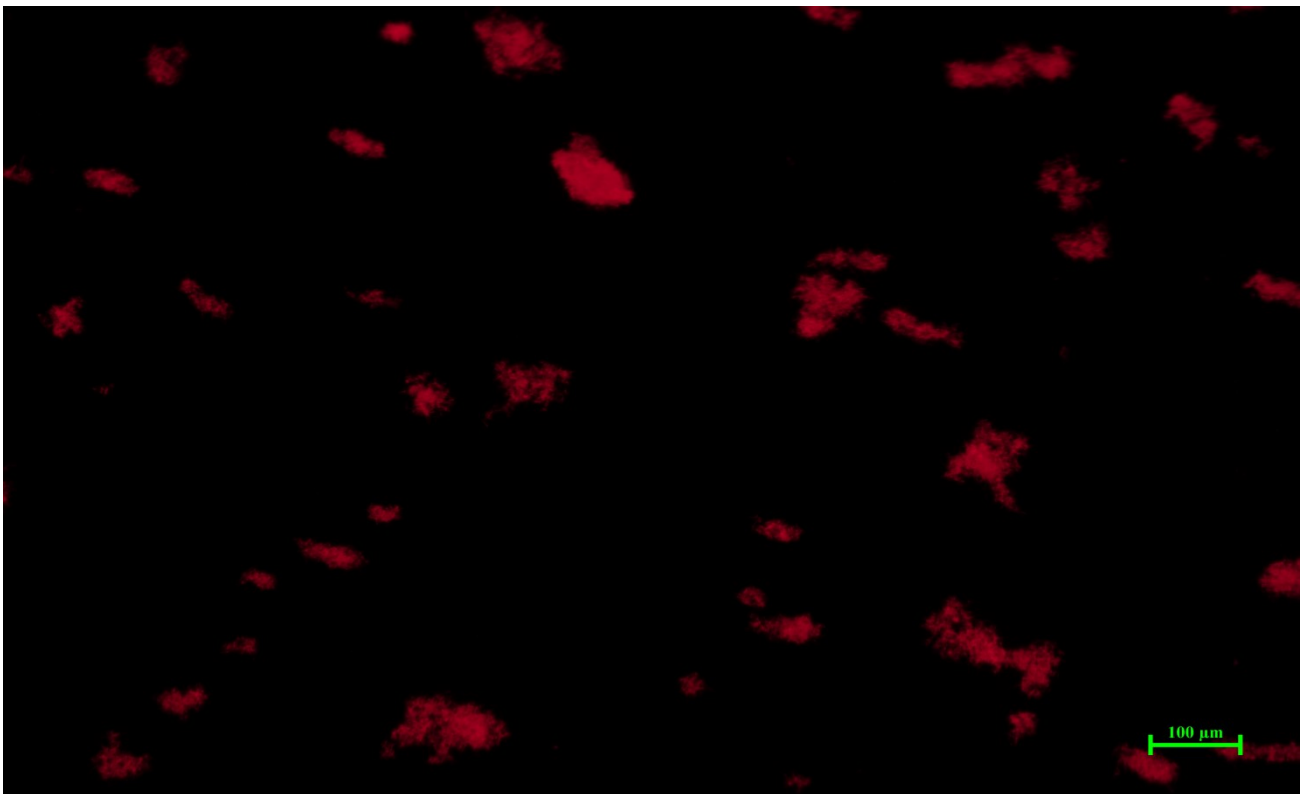

treated with 5aa

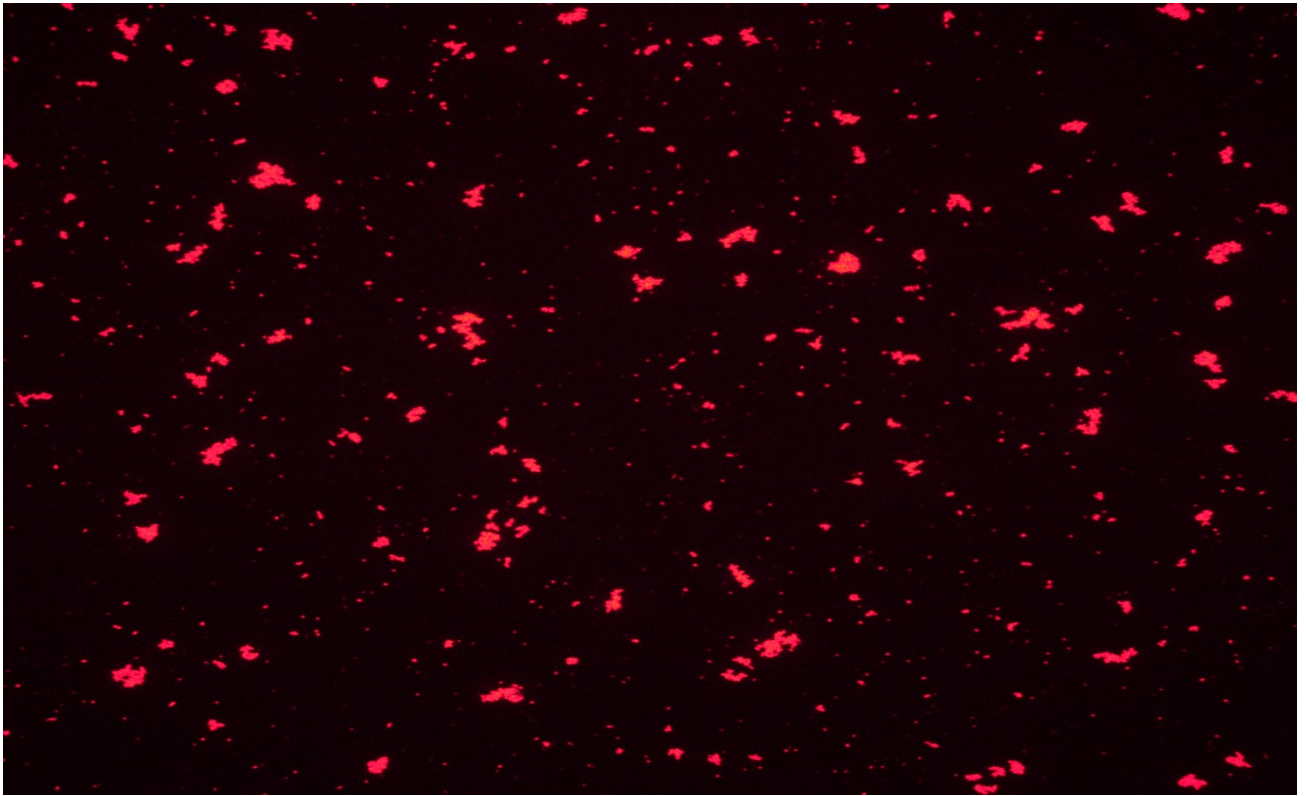

**treated with 5r**

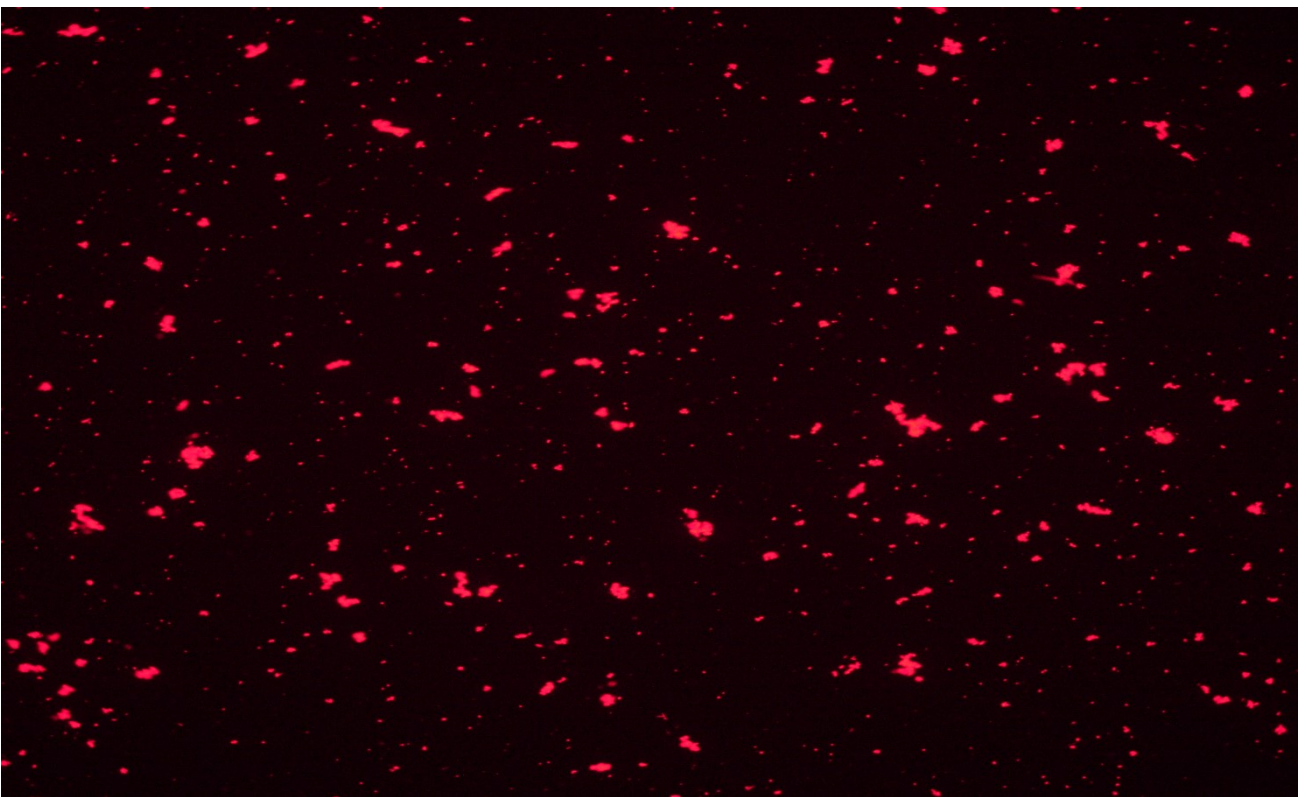

**treated with 5s**

**Fluorescence micrographs of multi-drug resistant *S. aureus* 20151027077 cells.**

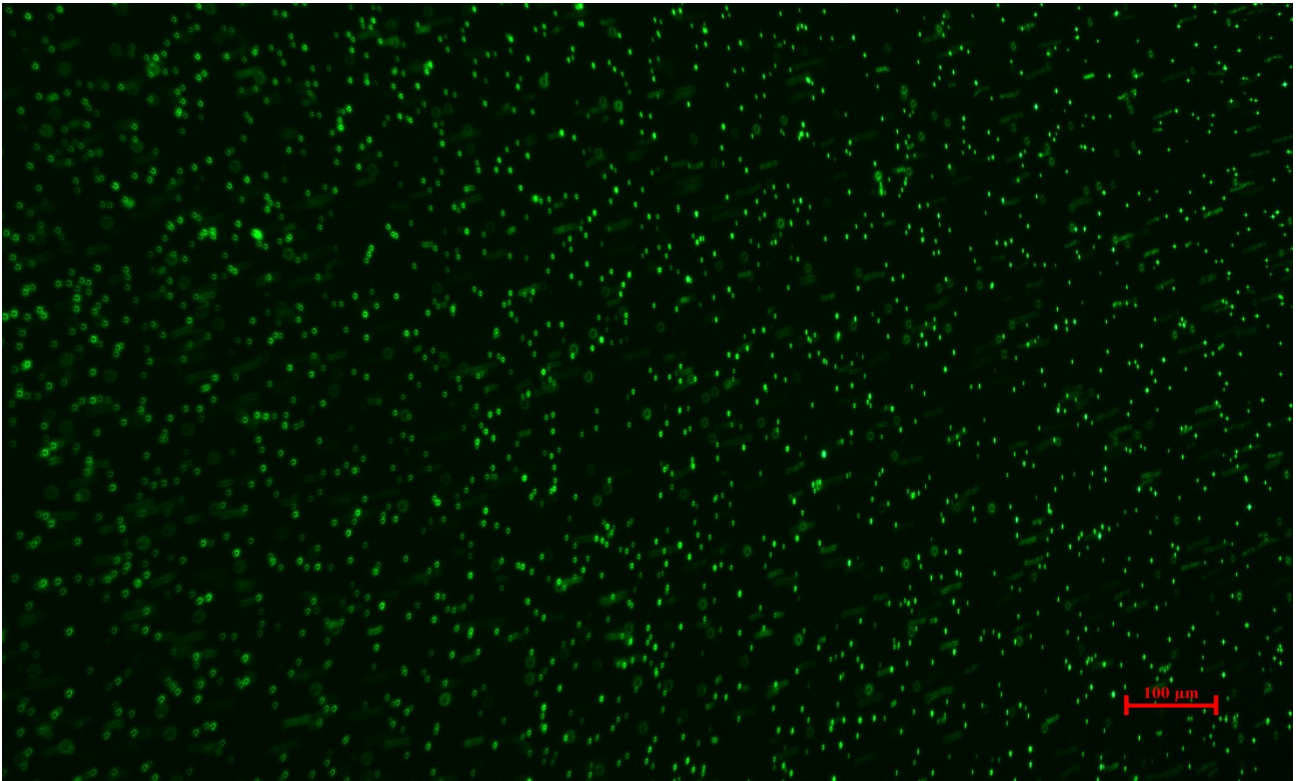

**treated with DMSO**

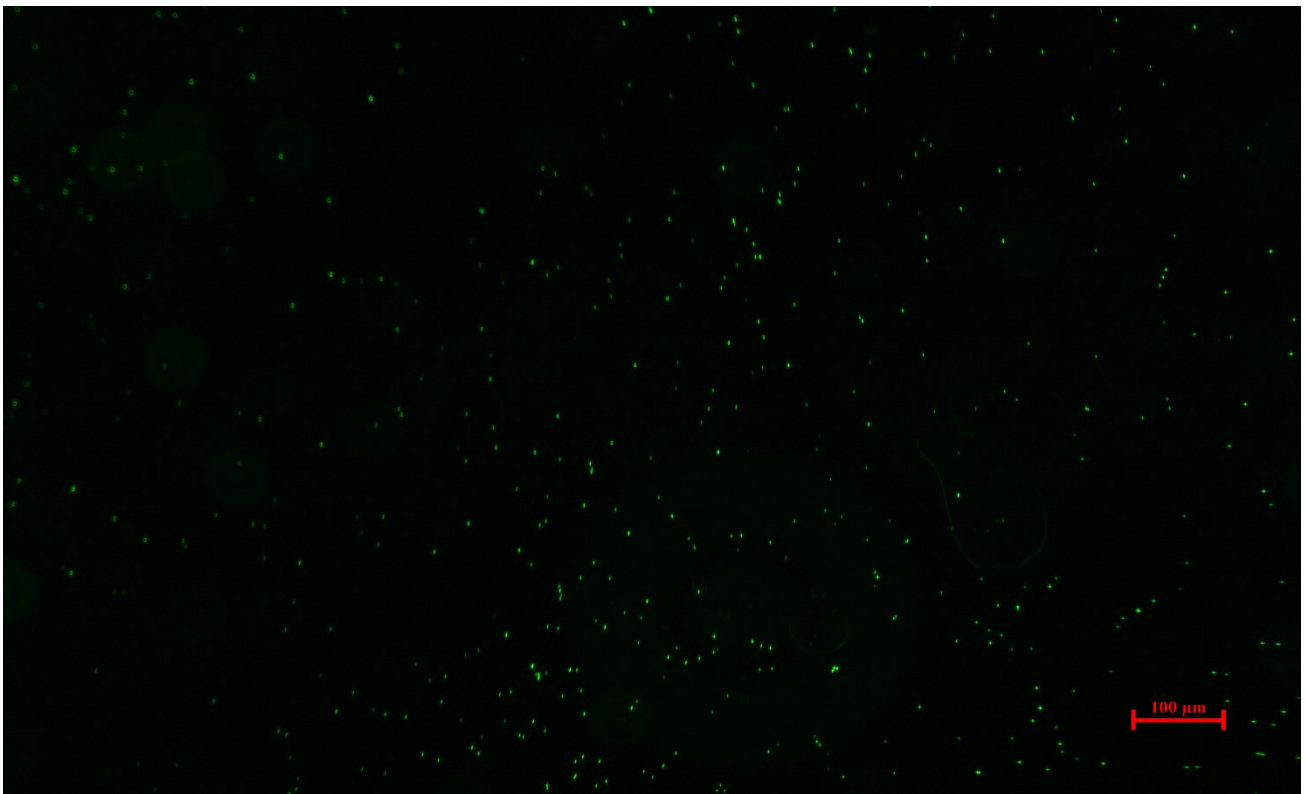

**treated with Levofloxacin**



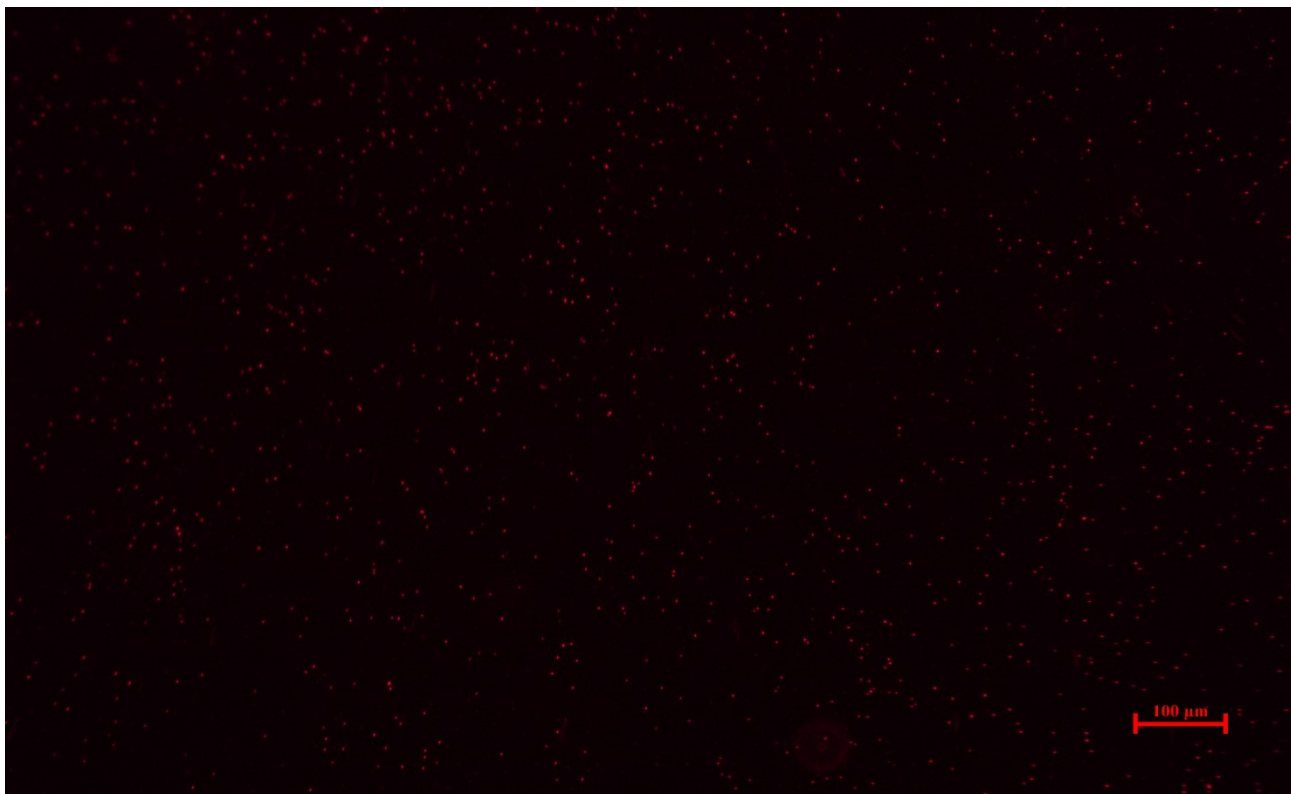

**treated with 5aa**

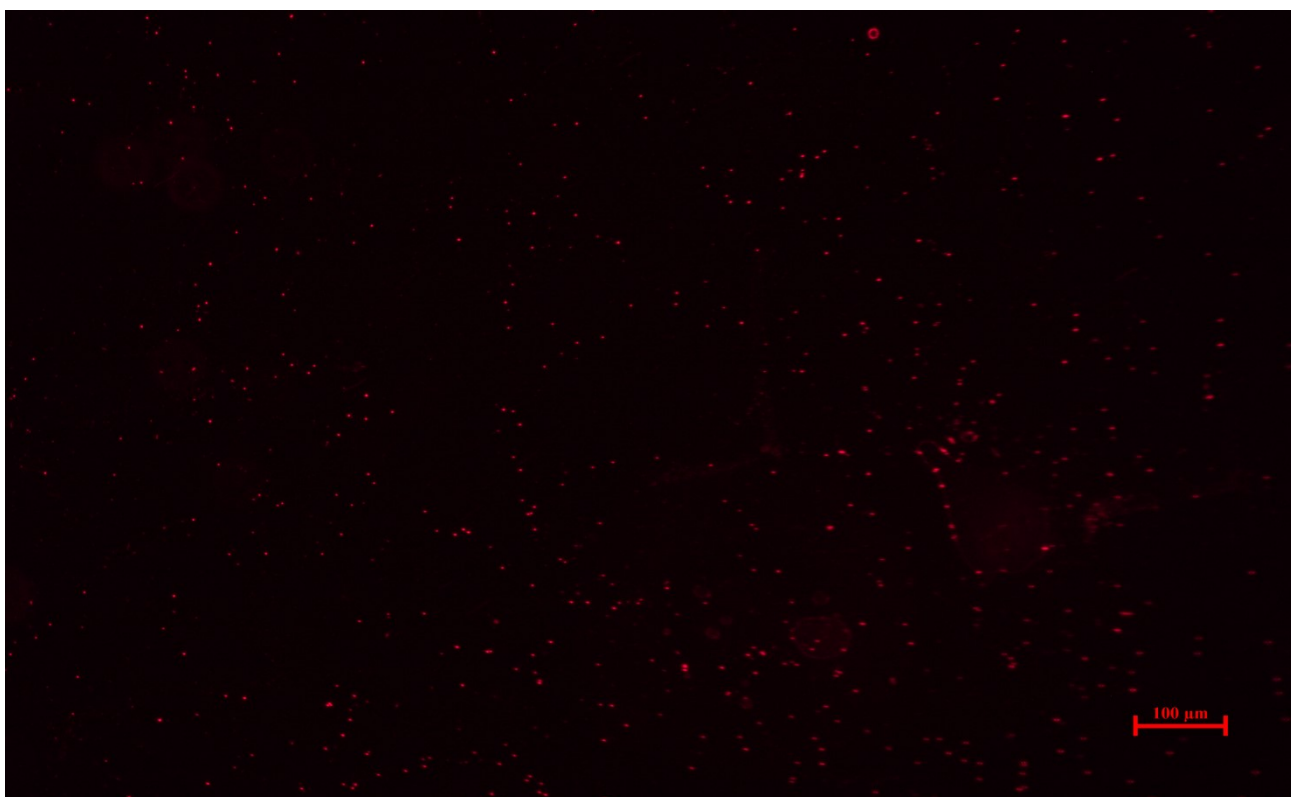

**treated with 5aa and Levofloxacin**

**Histopathological section of mice liver tissue after skin irritation test treated with 12.8  $\mu\text{g}/\text{mL}$  5aa for 1-72 h.**

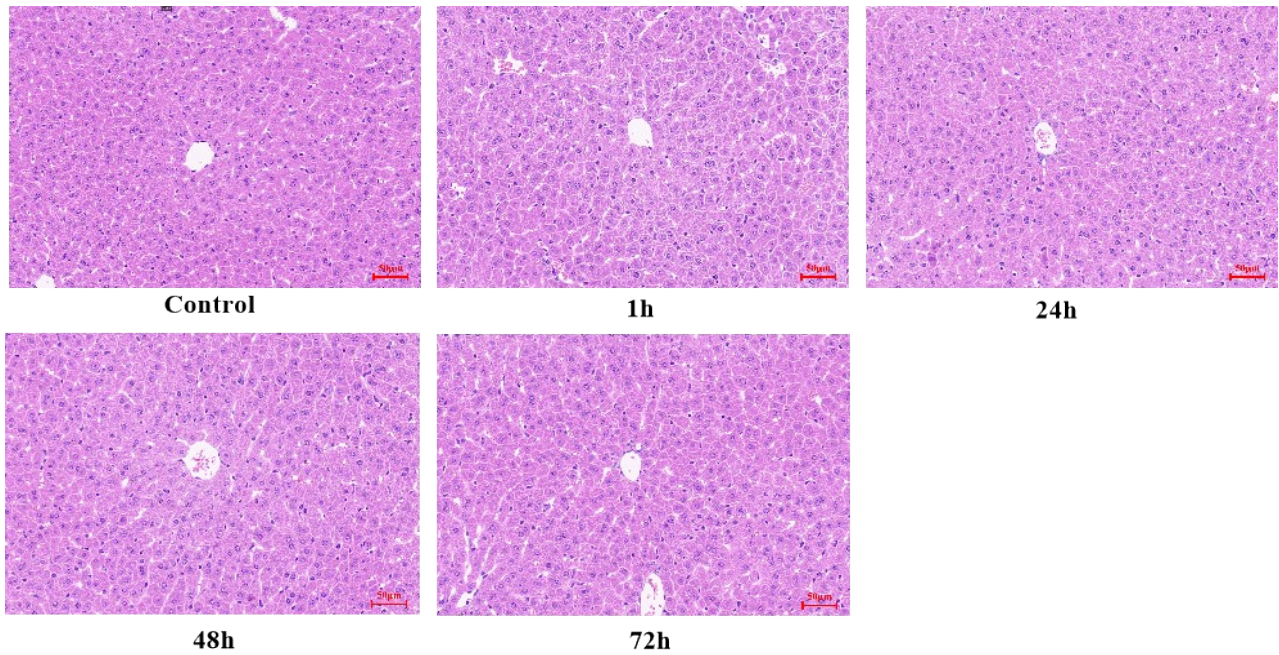

Supplement: d2ra01035f1.pdf [file d2ra01035f1.pdf]
